# Supplementary material
Source: publisher figshare collection journal article supplement (https://acs.figshare.com/ndownloader/files/25921132)
Supplement: Supplementary file 1 [file 25921132]

## Sheet: Readme
Name	Purpose	Number
Supplementary Data 1	Data for caculating VR according to Tier 1 of 2019 Refinement to the 2006 IPCC guidelines. Firstly, 985 VRs were classified to four types, i.e. induced by urea, ammonium-based, ammonium-nitrate-based and organic N fertilizer, to calculate their average VRs, respectively. Then the global VR was weighted by fertilizer type using our N input data. Sources include field studies only.	985
Supplementary Data 2	Data for simulating VR0. Sources include field studies only.	173
Supplementary Data 3	Data for simulating correction coefficient of air temperture. Sources include field studies only.	81
Supplementary Data 4	Data for simulating correction coefficient of soil or ponded water pH. Sources include field studies only.	78
Supplementary Data 5	Data for simulating correction coefficient of fertilizer type. Sources include manipulation experiments conducted in field, laboratory and greenhouse.	176
Supplementary Data 6	Data for simulating correction coefficient of fertilizer placement. Sources include manipulation experiments conducted in field, laboratory and greenhouse.	94
Citing references	Reference of Supplementary Data.	—
Total observed-VRs in supplementary		1165

## Sheet: Supplementary Data 1
Supplementary Data 1: Data for caculating VR according to Tier 1 of 2019 Refinement to the 2006 IPCC guidelines
Lon (°)	Lat (°)	Crop system	Fertilizer Types	VR	Measurement method	Reference No.	Dataset
120.635	31.6633	rice	urea	0.0592	dynamic chamber	1
120.635	31.6633	rice	urea	0.0721	dynamic chamber	1
120.635	31.6633	rice	urea	0.155067	dynamic chamber	1
120.635	31.6633	rice	urea	0.126914	dynamic chamber	1
120.183	31.3667	rice	urea	0.0377778	dynamic chamber	2
120.183	31.3667	rice	urea	0.06	dynamic chamber	2
120.183	31.3667	rice	urea	0.0674074	dynamic chamber	2
120.183	31.3667	rice	urea	0.123056	dynamic chamber	2
120.667	30.8333	rice	urea	0.0377778	dynamic chamber	2
120.667	30.8333	rice	urea	0.0516667	dynamic chamber	2
120.667	30.8333	rice	urea	0.0596296	dynamic chamber	2
120.667	30.8333	rice	urea	0.101944	dynamic chamber	2
120.3	30.5	rice	urea	0.0411111	dynamic chamber	2
120.3	30.5	rice	urea	0.0755556	dynamic chamber	2
120.3	30.5	rice	urea	0.0744444	dynamic chamber	2
120.3	30.5	rice	urea	0.1475	dynamic chamber	2
120.183	31.3667	rice	urea	0.0511111	dynamic chamber	2
120.183	31.3667	rice	urea	0.0911111	dynamic chamber	2
120.183	31.3667	rice	urea	0.0840741	dynamic chamber	2
120.183	31.3667	rice	urea	0.128333	dynamic chamber	2
120.667	30.8333	rice	urea	0.0533333	dynamic chamber	2
120.667	30.8333	rice	urea	0.06	dynamic chamber	2
120.667	30.8333	rice	urea	0.0785185	dynamic chamber	2
120.667	30.8333	rice	urea	0.115556	dynamic chamber	2
120.3	30.5	rice	urea	0.0477778	dynamic chamber	2
120.3	30.5	rice	urea	0.0877778	dynamic chamber	2
120.3	30.5	rice	urea	0.0937037	dynamic chamber	2
120.3	30.5	rice	urea	0.161667	dynamic chamber	2
111.5	28.9167	rice	urea	0.242312	dynamic chamber	3
111.5	28.9167	rice	urea	0.271833	dynamic chamber	3
111.5	28.9167	rice	urea	0.228782	dynamic chamber	3
111.5	28.9167	rice	urea	0.143559	dynamic chamber	3
111.5	28.9167	rice	urea	0.311701	dynamic chamber	3
111.5	28.9167	rice	urea	0.133727	dynamic chamber	3
111.5	28.9167	rice	urea	0.263223	dynamic chamber	3
111.5	28.9167	rice	urea	0.362854	dynamic chamber	3
111.5	28.9167	rice	urea	0.231242	dynamic chamber	3
111.5	28.9167	rice	urea	0.217306	dynamic chamber	3
111.5	28.9167	rice	urea	0.261554	dynamic chamber	3
111.5	28.9167	rice	urea	0.196657	dynamic chamber	3
120.753	31.6536	rice	urea	0.286815	micrometeorological method	4
120.753	31.6536	rice	urea	0.299111	micrometeorological method	4
120.699	31.5458	rice	urea	0.167633	dynamic chamber	5
120.699	31.5458	rice	urea	0.1387	dynamic chamber	5
120.412	30.44	rice	urea	0.100889	static chamber	6
120.412	30.44	rice	urea	0.130667	static chamber	6
120.412	30.44	rice	urea	0.161476	static chamber	6
120.412	30.44	rice	urea	0.218481	static chamber	6
120.412	30.44	rice	urea	0.240091	static chamber	6
115.5	29.9167	rice	urea	0.0888571	dynamic chamber	7
115.5	29.9167	rice	urea	0.0787143	dynamic chamber	7
119.169	31.945	rice	urea	0.051	dynamic chamber	8
119.169	31.945	rice	urea	0.0745	dynamic chamber	8
120.96	31.25	rice	urea	0.346746	static chamber	9
120.96	31.25	rice	urea	0.296715	static chamber	9
113.972	22.5922	rice	urea	0.129584	dynamic chamber	10
113.972	22.5922	rice	urea	0.174409	dynamic chamber	10
113.972	22.5922	rice	urea	0.123584	dynamic chamber	10
113.972	22.5922	rice	urea	0.158197	dynamic chamber	10
120.67	30.83	rice	urea	0.0543333	dynamic chamber	11
120.67	30.83	rice	urea	0.0866667	dynamic chamber	11
120.67	30.83	rice	urea	0.0856296	dynamic chamber	11
120.67	30.83	rice	urea	0.136472	dynamic chamber	11
120.667	30.8333	rice	urea	0.0555556	dynamic chamber	12
120.667	30.8333	rice	urea	0.0983333	dynamic chamber	12
119.9	31.2667	rice	urea	0.238221	dynamic chamber	13
119.9	31.2667	rice	urea	0.322644	dynamic chamber	13
119.9	31.2667	rice	urea	0.201054	dynamic chamber	13
120.699	31.55	rice	urea	0.279933	dynamic chamber	14
120.699	31.55	rice	urea	0.345833	dynamic chamber	14
120.699	31.55	rice	urea	0.281133	dynamic chamber	14
120.699	31.55	rice	urea	0.365267	dynamic chamber	14
120.667	30.8333	rice	urea	0.0737037	static chamber	15
120.699	31.5458	rice	urea	0.0614	dynamic chamber	16
120.699	31.5458	rice	urea	0.117	dynamic chamber	16
114.35	30.4667	rice	urea	0.190311	static chamber	17
114.35	30.4667	rice	urea	0.176044	static chamber	17
114.35	30.4667	rice	urea	0.184044	static chamber	17
115.5	29.9167	rice	urea	0.115333	static chamber	18
115.5	29.9167	rice	urea	0.0724762	static chamber	18
120.63	31.55	rice	urea	0.0882	dynamic chamber	19
120.63	31.55	rice	urea	0.0956	dynamic chamber	19
120.63	31.55	rice	urea	0.0986333	dynamic chamber	19
120.63	31.55	rice	urea	0.0934857	dynamic chamber	19
115.907	23.3539	rice	urea	0.292833	dynamic chamber	20
115.907	23.3539	rice	urea	0.338333	dynamic chamber	20
115.907	23.3539	rice	urea	0.376111	dynamic chamber	20
115.907	23.3539	rice	urea	0.3575	dynamic chamber	20
115.907	23.3539	rice	urea	0.3615	dynamic chamber	20
115.907	23.3539	rice	urea	0.4135	dynamic chamber	20
111.5	28.9167	rice	urea	0.151292	dynamic chamber	21
111.5	28.9167	rice	urea	0.250923	dynamic chamber	21
111.5	28.9167	rice	urea	0.126691	dynamic chamber	21
111.5	28.9167	rice	urea	0.232055	dynamic chamber	21
111.5	28.9167	rice	urea	0.317601	dynamic chamber	21
111.5	28.9167	rice	urea	0.204523	dynamic chamber	21
120.967	31.3833	rice	urea	0.210012	static chamber	22
120.967	31.3833	rice	urea	0.169039	static chamber	22
121.77	31.53	rice	urea	0.381111	static chamber	23
121.77	31.53	rice	urea	0.412667	static chamber	23
111.87	26.76	rice	urea	0.361182	dynamic chamber	24
111.87	26.76	rice	urea	0.418333	dynamic chamber	25
111.87	26.76	rice	urea	0.401867	dynamic chamber	25
106.267	38.1333	rice	urea	0.1825	dynamic chamber	26
106.267	38.1333	rice	urea	0.221667	dynamic chamber	26
123.4	41.52	rice	urea	0.0986667	dynamic chamber	27
123.4	41.52	rice	urea	0.114708	dynamic chamber	27
123.4	41.52	rice	urea	0.111867	dynamic chamber	27
120.699	31.55	rice	urea	0.15875	dynamic chamber	28
120.699	31.55	rice	urea	0.0425	dynamic chamber	28
115.907	28.3533	rice	urea	0.26163	dynamic chamber	29
115.907	28.3533	rice	urea	0.316593	dynamic chamber	29
117.767	31.65	rice	urea	0.0562658	static chamber	30
117.767	31.65	rice	urea	0.0663551	static chamber	30
117.767	31.65	rice	urea	0.0567111	static chamber	30
120.2	30.2667	rice	urea	0.06325	static chamber	31
120.2	30.2667	rice	urea	0.0554375	static chamber	31
120.2	30.2667	rice	urea	0.0457917	static chamber	31
120.699	31.55	rice	urea	0.0758333	dynamic chamber	32
120.699	31.55	rice	urea	0.0283333	dynamic chamber	33
120.699	31.55	rice	urea	0.0421569	dynamic chamber	33
120.699	31.55	rice	urea	0.0462121	dynamic chamber	33
120.699	31.55	rice	urea	0.127722	dynamic chamber	33
120.699	31.55	rice	urea	0.104275	dynamic chamber	33
120.699	31.55	rice	urea	0.125843	dynamic chamber	33
120.699	31.55	rice	urea	0.140745	dynamic chamber	33
120.699	31.55	rice	urea	0.110576	dynamic chamber	33
120.699	31.55	rice	urea	0.128889	dynamic chamber	34
120.699	31.55	rice	urea	0.222222	dynamic chamber	34
120.699	31.55	rice	urea	0.224033	dynamic chamber	34
120.699	31.55	rice	urea	0.0977778	dynamic chamber	34
120.699	31.55	rice	urea	0.12	dynamic chamber	34
120.699	31.55	rice	urea	0.163067	dynamic chamber	34
120.699	31.55	rice	urea	0.0844	dynamic chamber	34
120.699	31.55	rice	urea	0.0977333	dynamic chamber	34
120.699	31.55	rice	urea	0.1033	dynamic chamber	34
120.697	31.5328	rice	urea	0.286667	micrometeorological method	35
120.697	31.5328	rice	urea	0.299259	micrometeorological method	35
120.1	31.5167	rice	urea	0.288095	static chamber	36
120.1	31.5167	rice	urea	0.281111	static chamber	36
120.64	31.66	rice	urea	0.0369	dynamic chamber	37
120.64	31.66	rice	urea	0.0621333	dynamic chamber	37
120.64	31.66	rice	urea	0.09365	dynamic chamber	37
120.64	31.66	rice	urea	0.09232	dynamic chamber	37
120.64	31.66	rice	urea	0.106667	dynamic chamber	37
120.64	31.66	rice	urea	0.111686	dynamic chamber	37
121.23	32.07	rice	urea	0.045	dynamic chamber	38
121.23	32.07	rice	urea	0.105926	dynamic chamber	38
121.23	32.07	rice	urea	0.119444	dynamic chamber	38
121.23	32.07	rice	urea	0.195556	dynamic chamber	38
120.1	31.5167	rice	urea	0.2	static chamber	39
120.1	31.5167	rice	urea	0.211111	static chamber	39
114.312	30.4875	rice	urea	0.161701	dynamic chamber	40
114.312	30.4875	rice	urea	0.193857	dynamic chamber	40
111.87	26.76	rice	urea	0.377467	dynamic chamber	41
111.87	26.76	rice	urea	0.379333	dynamic chamber	41
120.699	31.5458	rice	urea	0.270133	dynamic chamber	42
120.699	31.5458	rice	urea	0.335067	dynamic chamber	42
115.55	29.85	rice	urea	0.0488656	static chamber	43
115.55	29.85	rice	urea	0.150904	static chamber	43
100.05	26.0167	rice	urea	0.130074	dynamic chamber	44
100.05	26.0167	rice	urea	0.140889	dynamic chamber	44
100.05	26.0167	rice	urea	0.147822	dynamic chamber	44
100.05	26.0167	rice	urea	0.158778	dynamic chamber	44
100.05	26.0167	rice	urea	0.170889	dynamic chamber	44
120.7	31.55	rice	urea	0.177222	dynamic chamber	45
120.7	31.55	rice	urea	0.23	dynamic chamber	45
120.7	31.55	rice	urea	0.00383333	dynamic chamber	45
120.7	31.55	rice	urea	0.030375	dynamic chamber	45
119.4	32.4	rice	urea	0.1093	dynamic chamber	46
119.4	32.4	rice	urea	0.17515	dynamic chamber	46
119.4	32.4	rice	urea	0.234733	dynamic chamber	46
119.4	32.4	rice	urea	0.2551	dynamic chamber	46
119.4	32.4	rice	urea	0.105	dynamic chamber	46
119.4	32.4	rice	urea	0.1407	dynamic chamber	46
119.4	32.4	rice	urea	0.1828	dynamic chamber	46
119.4	32.4	rice	urea	0.2166	dynamic chamber	46
111.867	26.75	rice	urea	0.124888	dynamic chamber	47
111.867	26.75	rice	urea	0.305777	dynamic chamber	47
111.867	26.75	rice	urea	0.14044	dynamic chamber	47
111.867	26.75	rice	urea	0.24222	dynamic chamber	47
111.867	26.75	rice	urea	0.10512	dynamic chamber	47
111.867	26.75	rice	urea	0.24456	dynamic chamber	47
111.867	26.75	rice	urea	0.121169	dynamic chamber	47
111.867	26.75	rice	urea	0.233251	dynamic chamber	47
119.9	31.2667	rice	urea	0.0528361	dynamic chamber	48
119.9	31.2667	rice	urea	0.0675437	dynamic chamber	48
119.9	31.2667	rice	urea	0.133489	dynamic chamber	48
119.9	31.2667	rice	urea	0.259283	dynamic chamber	48
120.2	30.2667	rice	urea	0.05375	static chamber	49
120.2	30.2667	rice	urea	0.04775	static chamber	49
120.2	30.2667	rice	urea	0.0457917	static chamber	49
120.2	30.2667	rice	urea	0.05925	static chamber	49
120.2	30.2667	rice	urea	0.0565625	static chamber	49
120.2	30.2667	rice	urea	0.0545417	static chamber	49
77.2	28.6667	rice	urea	0.0483333	micrometeorological method	50
139.067	36.2	rice	organic N fertilizer	0.377778	dynamic chamber	51
139.067	36.2	rice	organic N fertilizer	0.295556	dynamic chamber	51
139.067	36.2	rice	urea	0.122333	dynamic chamber	51
106.033	21.35	rice	organic N fertilizer	0.1025	dynamic chamber	52
106.033	21.35	rice	organic N fertilizer	0.1025	dynamic chamber	52
106.033	21.35	rice	organic N fertilizer	0.05	dynamic chamber	52
105.517	21.1167	rice	organic N fertilizer	0.14625	dynamic chamber	52
105.517	21.1167	rice	organic N fertilizer	0.133333	dynamic chamber	52
105.583	10.1333	rice	organic N fertilizer	0.148148	dynamic chamber	52
105.583	10.1333	rice	organic N fertilizer	0.0174782	dynamic chamber	52
105.583	10.1333	rice	organic N fertilizer	0.00988889	dynamic chamber	53
140.117	36.0167	rice	organic N fertilizer	0.0203333	dynamic chamber	54
140.117	36.0167	rice	organic N fertilizer	0.00822222	dynamic chamber	54
140.117	36.0167	rice	organic N fertilizer	0.0142222	dynamic chamber	54
100.133	14.4667	rice	organic N fertilizer	0.195	micrometeorological method	55
100.133	14.4667	rice	organic N fertilizer	0.15	micrometeorological method	56
100.133	14.4667	rice	organic N fertilizer	0.145	micrometeorological method	50
76.98	29.7	rice	urea	0.034	static chamber	57
85.93	20.45	rice	urea	0.0317778	static chamber	58
85.93	20.45	rice	organic N fertilizer	0.0373333	static chamber	58
85.93	20.45	rice	urea	0.085	static chamber	59
85.93	20.45	rice	urea	0.0558333	static chamber	59
85.93	20.45	rice	organic N fertilizer	0.036875	static chamber	59
85.93	20.45	rice	organic N fertilizer	0.0454545	static chamber	59
77.2	28.6667	rice	urea	0.244167	static chamber	60
77.2	28.6667	rice	organic N fertilizer	0.228333	static chamber	60
121.43	14.43	rice	urea	0.42	micrometeorological method	61	Bouwman
121.43	14.43	rice	urea	0.43	micrometeorological method	61	Bouwman
121.43	14.43	rice	urea	0.11	micrometeorological method	61	Bouwman
121.43	14.43	rice	urea	0.07	micrometeorological method	61	Bouwman
121.32	14.15	rice	urea	0.27	micrometeorological method	61	Bouwman
121.32	14.15	rice	urea	0.23	micrometeorological method	61	Bouwman
121.32	14.15	rice	urea	0.12	micrometeorological method	61	Bouwman
121.32	14.15	rice	urea	0.12	micrometeorological method	61	Bouwman
121.32	14.15	rice	urea	0.11	micrometeorological method	61	Bouwman
121.32	14.15	rice	urea	0.16	micrometeorological method	61	Bouwman
120.29	15.89	rice	urea	0.14	micrometeorological method	61	Bouwman
120.29	15.89	rice	urea	0.1	micrometeorological method	61	Bouwman
120.29	15.89	rice	urea	0.1	micrometeorological method	61	Bouwman
120.29	15.89	rice	urea	0.1	micrometeorological method	61	Bouwman
120.29	15.89	rice	urea	0.04	micrometeorological method	61	Bouwman
120.29	15.89	rice	urea	0.05	micrometeorological method	61	Bouwman
119.97	15.51	rice	urea	0.26	micrometeorological method	61	Bouwman
119.97	15.51	rice	urea	0.36	micrometeorological method	61	Bouwman
119.97	15.51	rice	urea	0.3	micrometeorological method	61	Bouwman
119.97	15.51	rice	urea	0.26	micrometeorological method	61	Bouwman
119.97	15.51	rice	urea	0.14	micrometeorological method	61	Bouwman
119.97	15.51	rice	urea	0.1	micrometeorological method	61	Bouwman
121.45	14.14	rice	urea	0.11	micrometeorological method	62	Bouwman
121.45	14.14	rice	urea	0.07	micrometeorological method	62	Bouwman
121.45	14.14	rice	urea	0.42	micrometeorological method	62	Bouwman
121.45	14.14	rice	urea	0.43	micrometeorological method	62	Bouwman
121.32	14.15	rice	urea	0.2576	micrometeorological method	63	Bouwman
121.32	14.15	rice	urea	0.2576	micrometeorological method	63	Bouwman
121.24	14.17	rice	urea	0.13	micrometeorological method	64	Bouwman
121.24	14.17	rice	urea	0.27	micrometeorological method	64	Bouwman
121.24	14.17	rice	urea	0.15	micrometeorological method	64	Bouwman
120.9	15.72	rice	urea	0.1	micrometeorological method	64	Bouwman
146.417	-30.5833	rice	urea	0.206125	micrometeorological method	65	Bouwman
146.417	-30.5833	rice	urea	0.11	micrometeorological method	66	Bouwman
121.25	14.17	rice	ammonium-based	0.07	micrometeorological method	67	Bouwman
79.49	29.02	rice	urea	0.38	static chamber	68	Bouwman
79.49	29.02	rice	urea	0.2865	static chamber	68	Bouwman
79.49	29.02	rice	urea	0.248333	static chamber	68	Bouwman
79.49	29.02	rice	urea	0.34175	static chamber	68	Bouwman
79.49	29.02	rice	urea	0.270833	static chamber	68	Bouwman
79.49	29.02	rice	urea	0.23	static chamber	68	Bouwman
79.49	29.02	rice	urea	0.1	static chamber	68	Bouwman
79.49	29.02	rice	urea	0.11	static chamber	68	Bouwman
79.49	29.02	rice	urea	0.0483333	static chamber	68	Bouwman
79.49	29.02	rice	urea	0.275	static chamber	68	Bouwman
79.49	29.02	rice	urea	0.123333	static chamber	68	Bouwman
79.49	29.02	rice	urea	0.138333	static chamber	68	Bouwman
79.49	29.02	rice	urea	0.0516667	static chamber	68	Bouwman
79.49	29.02	rice	urea	0.256667	static chamber	68	Bouwman
79.49	29.02	rice	urea	0.128333	static chamber	68	Bouwman
79.49	29.02	rice	urea	0.138333	static chamber	68	Bouwman
79.49	29.02	rice	urea	0.258333	static chamber	68	Bouwman
79.49	29.02	rice	urea	0.128333	static chamber	68	Bouwman
79.49	29.02	rice	urea	0.138333	static chamber	68	Bouwman
79.49	29.02	rice	urea	0.236	static chamber	68	Bouwman
79.49	29.02	rice	urea	0.255	static chamber	68	Bouwman
79.49	29.02	rice	urea	0.189	static chamber	68	Bouwman
79.49	29.02	rice	urea	0.1555	static chamber	68	Bouwman
79.49	29.02	rice	urea	0.1635	static chamber	68	Bouwman
79.49	29.02	rice	urea	0.0975	static chamber	68	Bouwman
79.49	29.02	rice	urea	0.137333	static chamber	68	Bouwman
79.49	29.02	rice	urea	0.145333	static chamber	68	Bouwman
79.49	29.02	rice	urea	0.0693333	static chamber	68	Bouwman
79.49	29.02	rice	urea	0.2915	static chamber	68	Bouwman
79.49	29.02	rice	urea	0.3215	static chamber	68	Bouwman
79.49	29.02	rice	urea	0.2345	static chamber	68	Bouwman
79.49	29.02	rice	urea	0.17875	static chamber	68	Bouwman
79.49	29.02	rice	urea	0.19375	static chamber	68	Bouwman
79.49	29.02	rice	urea	0.11975	static chamber	68	Bouwman
79.49	29.02	rice	urea	0.155833	static chamber	68	Bouwman
79.49	29.02	rice	urea	0.168833	static chamber	68	Bouwman
79.49	29.02	rice	urea	0.0808333	static chamber	68	Bouwman
146.417	-30.5833	rice	urea	0.262	micrometeorological method	69	Bouwman
146.417	-30.5833	rice	urea	0.182	micrometeorological method	69	Bouwman
145.59	-34.29	rice	urea	0.11	micrometeorological method	70	Bouwman
145.59	-34.29	rice	urea	0.21	micrometeorological method	70	Bouwman
145.59	-34.29	rice	urea	0.03	micrometeorological method	70	Bouwman
145.59	-34.29	rice	urea	0.18	micrometeorological method	70	Bouwman
145.59	-34.29	rice	urea	0.08	micrometeorological method	70	Bouwman
146.417	-30.5833	rice	urea	0.205	micrometeorological method	71	Bouwman
146.417	-30.5833	rice	urea	0.173	micrometeorological method	71	Bouwman
120.9	15.72	rice	urea	0.36	micrometeorological method	72	Bouwman
120.9	15.72	rice	ammonium-based	0.38	micrometeorological method	72	Bouwman
120.9	15.72	rice	urea	0.414	micrometeorological method	72	Bouwman
85.8167	20.4333	rice	urea	0.036	static chamber	73	Bouwman
85.8167	20.4333	rice	urea	0.03	static chamber	73	Bouwman
85.8167	20.4333	rice	urea	0.036	static chamber	73	Bouwman
85.8167	20.4333	rice	urea	0.03	static chamber	73	Bouwman
85.8167	20.4333	rice	urea	0.06	static chamber	73	Bouwman
85.8167	20.4333	rice	urea	0.09	static chamber	73	Bouwman
85.8167	20.4333	rice	urea	0.058	static chamber	73	Bouwman
85.8167	20.4333	rice	urea	0.026	static chamber	73	Bouwman
85.8167	20.4333	rice	urea	0.045	static chamber	73	Bouwman
85.8167	20.4333	rice	urea	0.029	static chamber	73	Bouwman
85.8167	20.4333	rice	urea	0.08	static chamber	73	Bouwman
85.8167	20.4333	rice	urea	0.028	static chamber	73	Bouwman
121.32	14.15	rice	urea	0.27	micrometeorological method	74	Bouwman
121.32	14.15	rice	urea	0.17	micrometeorological method	74	Bouwman
121.32	14.15	rice	urea	0.18	micrometeorological method	74	Bouwman
121.32	14.15	rice	urea	0.15	micrometeorological method	74	Bouwman
121.32	14.15	rice	urea	0.1	micrometeorological method	74	Bouwman
121.32	14.15	rice	urea	0.07	micrometeorological method	74	Bouwman
120.15	14.97	rice	urea	0.3	micrometeorological method	74	Bouwman
120.15	14.97	rice	urea	0.27	micrometeorological method	74	Bouwman
120.15	14.97	rice	urea	0.27	micrometeorological method	74	Bouwman
120.15	14.97	rice	urea	0.37	micrometeorological method	74	Bouwman
120.15	14.97	rice	urea	0.15	micrometeorological method	74	Bouwman
120.15	14.97	rice	urea	0.11	micrometeorological method	74	Bouwman
121.32	14.15	rice	urea	0.09	micrometeorological method	74	Bouwman
120.15	14.97	rice	urea	0.19	micrometeorological method	74	Bouwman
121.25	14.17	rice	ammonium-based	0.002	static chamber	75	Bouwman
121.25	14.17	rice	ammonium-based	0.02	static chamber	75	Bouwman
121.25	14.17	rice	ammonium-based	0.035	static chamber	75	Bouwman
121.25	14.17	rice	ammonium-based	0.05	static chamber	75	Bouwman
121.25	14.17	rice	ammonium-based	0.07	static chamber	75	Bouwman
121.25	14.17	rice	urea	0.002	static chamber	75	Bouwman
121.25	14.17	rice	urea	0.012	static chamber	75	Bouwman
121.25	14.17	rice	urea	0.023	static chamber	75	Bouwman
121.25	14.17	rice	urea	0.04	static chamber	75	Bouwman
121.25	14.17	rice	urea	0.06	static chamber	75	Bouwman
121.25	14.17	rice	ammonium-based	0.06	static chamber	75	Bouwman
121.25	14.17	rice	ammonium-based	0.09	static chamber	75	Bouwman
121.25	14.17	rice	ammonium-based	0.15	static chamber	75	Bouwman
121.25	14.17	rice	urea	0.05	static chamber	75	Bouwman
121.25	14.17	rice	urea	0.11	static chamber	75	Bouwman
121.25	14.17	rice	urea	0.18	static chamber	75	Bouwman
121.25	14.17	rice	ammonium-based	0.003	static chamber	75	Bouwman
121.25	14.17	rice	ammonium-based	0.01	static chamber	75	Bouwman
121.25	14.17	rice	ammonium-based	0.006	static chamber	75	Bouwman
121.25	14.17	rice	ammonium-based	0.004	static chamber	75	Bouwman
121.25	14.17	rice	ammonium-based	0.002	static chamber	75	Bouwman
121.25	14.17	rice	ammonium-based	0.002	static chamber	75	Bouwman
121.25	14.17	rice	ammonium-based	0.002	static chamber	75	Bouwman
121.25	14.17	rice	ammonium-based	0.002	static chamber	75	Bouwman
121.25	14.17	rice	ammonium-based	0.002	static chamber	75	Bouwman
121.25	14.17	rice	ammonium-based	0.2	static chamber	75	Bouwman
121.25	14.17	rice	ammonium-based	0.065	static chamber	75	Bouwman
121.25	14.17	rice	ammonium-based	0.06	static chamber	75	Bouwman
121.25	14.17	rice	ammonium-based	0.06	static chamber	75	Bouwman
121.25	14.17	rice	ammonium-based	0.04	static chamber	75	Bouwman
121.25	14.17	rice	ammonium-based	0.012	static chamber	75	Bouwman
121.25	14.17	rice	ammonium-based	0.011	static chamber	75	Bouwman
121.25	14.17	rice	ammonium-based	0.01	static chamber	75	Bouwman
121.25	14.17	rice	ammonium-based	0.06	static chamber	75	Bouwman
88.55	23.4667	rice	urea	0.135	static chamber	76	Bouwman
88.55	23.4667	rice	urea	0.07	static chamber	76	Bouwman
88.55	23.4667	rice	urea	0.1	static chamber	76	Bouwman
88.55	23.4667	rice	urea	0.1	static chamber	76	Bouwman
88.55	23.4667	rice	organic N fertilizer	0.055	static chamber	76	Bouwman
88.55	23.4667	rice	urea	0.13	static chamber	76	Bouwman
88.55	23.4667	rice	urea	0.095	static chamber	76	Bouwman
88.55	23.4667	rice	urea	0.1	static chamber	76	Bouwman
88.55	23.4667	rice	urea	0.105	static chamber	76	Bouwman
88.55	23.4667	rice	organic N fertilizer	0.07	static chamber	76	Bouwman
76.2	10.8	rice	urea	0.0143333	static chamber	77	Bouwman
76.2	10.8	rice	urea	0.0304444	static chamber	77	Bouwman
76.2	10.8	rice	urea	0.0136667	static chamber	77	Bouwman
76.2	10.8	rice	urea	0.056	static chamber	77	Bouwman
76.2	10.8	rice	organic N fertilizer	0.0112222	static chamber	77	Bouwman
76.2	10.8	rice	urea	0.0586667	static chamber	77	Bouwman
76.2	10.8	rice	urea	0.0965556	static chamber	77	Bouwman
76.2	10.8	rice	urea	0.0817778	static chamber	77	Bouwman
76.2	10.8	rice	organic N fertilizer	0.0647778	static chamber	77	Bouwman
76.2	10.8	rice	urea	0.094	static chamber	77	Bouwman
76.2	10.8	rice	urea	0.102222	static chamber	77	Bouwman
76.2	10.8	rice	urea	0.114	static chamber	77	Bouwman
146.417	-30.5833	rice	urea	0.15875	micrometeorological method	78	Bouwman
146.417	-30.5833	rice	urea	0.13625	micrometeorological method	78	Bouwman
146.417	-35.5833	rice	urea	0.0038	micrometeorological method	79	Bouwman
146.417	-35.5833	rice	urea	0.0016	micrometeorological method	79	Bouwman
146.417	-35.5833	rice	urea	0.00535714	micrometeorological method	79	Bouwman
79.4667	11.0167	rice	urea	0.0661481	static chamber	80	Bouwman
79.4667	11.0167	rice	urea	0.106519	static chamber	80	Bouwman
79.4667	11.0167	rice	urea	0.0425185	static chamber	80	Bouwman
79.4667	11.0167	rice	urea	0.0702222	static chamber	80	Bouwman
79.4667	11.0167	rice	urea	0.0567407	static chamber	80	Bouwman
79.4667	11.0167	rice	urea	0.0541852	static chamber	80	Bouwman
79.4667	11.0167	rice	urea	0.0505185	static chamber	80	Bouwman
79.4667	11.0167	rice	organic N fertilizer	0.0437407	static chamber	80	Bouwman
79.4667	11.0167	rice	urea	0.0554815	static chamber	80	Bouwman
79.4667	11.0167	rice	urea	0.102519	static chamber	80	Bouwman
79.4667	11.0167	rice	urea	0.0322963	static chamber	80	Bouwman
79.4667	11.0167	rice	urea	0.0614444	static chamber	80	Bouwman
79.4667	11.0167	rice	urea	0.0414815	static chamber	80	Bouwman
79.4667	11.0167	rice	urea	0.0905185	static chamber	80	Bouwman
79.4667	11.0167	rice	urea	0.0398519	static chamber	80	Bouwman
79.4667	11.0167	rice	urea	0.0533333	static chamber	80	Bouwman
79.4667	11.0167	rice	organic N fertilizer	0.0297037	static chamber	80	Bouwman
79.4667	11.0167	rice	organic N fertilizer	0.0865185	static chamber	80	Bouwman
79.4667	11.0167	rice	organic N fertilizer	0.0282963	static chamber	80	Bouwman
79.4667	11.0167	rice	organic N fertilizer	0.0434444	static chamber	80	Bouwman
121.25	14.17	rice	ammonium-based	0.2	dynamic chamber	81	Bouwman
121.25	14.17	rice	ammonium-based	0.3	dynamic chamber	81	Bouwman
121.25	14.17	rice	ammonium-based	0.05	dynamic chamber	81	Bouwman
0.0166667	51.5	rice	urea	0.152	static chamber	82	Bouwman
0.0166667	51.5	rice	urea	0.036	static chamber	82	Bouwman
0.0166667	51.5	rice	urea	0.11	static chamber	82	Bouwman
0.0166667	51.5	rice	organic N fertilizer	0.113	static chamber	82	Bouwman
114.683	37.8833	upland	urea	0.061625	micrometeorological method	83
120.753	31.6536	upland	urea	0.12237	micrometeorological method	84
120.753	31.6536	upland	urea	0.176533	micrometeorological method	84
117.151	36.1719	upland	urea	0.0304	static chamber	85
113.383	23.1667	upland	urea	0.10888	dynamic chamber	86
108	34.28	upland	urea	0.0108	dynamic chamber	87
108	34.28	upland	urea	0.0203	dynamic chamber	87
114.351	30.47	upland	urea	0.0419048	static chamber	88
114.351	30.47	upland	urea	0.0171429	static chamber	88
120.667	30.8333	upland	urea	0.0361111	dynamic chamber	12
120.667	30.8333	upland	urea	0.055	dynamic chamber	12
119.9	31.2667	upland	urea	0.254092	dynamic chamber	13
119.9	31.2667	upland	urea	0.053277	dynamic chamber	13
119.9	31.2667	upland	urea	0.100526	dynamic chamber	13
116.279	40.0255	upland	urea	0.0416667	static chamber	89
116.279	40.0255	upland	urea	0.0708333	static chamber	89
116.279	40.0255	upland	urea	0.188889	static chamber	89
120.699	31.5458	upland	urea	0.0121	dynamic chamber	16
120.699	31.5458	upland	urea	0.00848	dynamic chamber	16
114.683	37.8833	upland	urea	0.0123333	dynamic chamber	90
117.15	36.15	upland	urea	0.116143	static chamber	91
117.15	36.15	upland	urea	0.124767	static chamber	91
116.608	39.5089	upland	urea	0.0104333	static chamber	92
116.608	39.5089	upland	urea	0.00853333	static chamber	92
115.783	38.1333	upland	urea	0.0152	dynamic chamber	93
115.783	38.1333	upland	urea	0.0149333	dynamic chamber	93
115.783	38.1333	upland	urea	0.028	dynamic chamber	93
115.783	38.1333	upland	urea	0.036	dynamic chamber	93
120.63	31.55	upland	urea	0.0966	dynamic chamber	19
120.63	31.55	upland	urea	0.101133	dynamic chamber	19
120.63	31.55	upland	urea	0.08815	dynamic chamber	19
120.63	31.55	upland	urea	0.08488	dynamic chamber	19
113.167	35.0667	upland	urea	0.0245333	static chamber	94
113.167	35.0667	upland	urea	0.0334667	static chamber	94
113.167	35.0667	upland	urea	0.0555667	static chamber	94
116.608	39.5089	upland	urea	0.00733333	static chamber	95
116.608	39.5089	upland	urea	0.00666667	static chamber	95
113.967	22.59	upland	urea	0.193051	dynamic chamber	96
116.92	28.2	upland	urea	0.00528571	dynamic chamber	97
116.92	28.2	upland	urea	0.00738462	dynamic chamber	97
116.92	28.2	upland	urea	0.00731579	dynamic chamber	97
116.92	28.2	upland	urea	0.01216	dynamic chamber	97
116.3	39.5	upland	urea	0.150333	dynamic chamber	98
115.783	38.1333	upland	urea	0.0498333	dynamic chamber	99
115.783	38.1333	upland	urea	0.0506667	dynamic chamber	99
115.783	38.1333	upland	urea	0.0427222	dynamic chamber	99
115.783	38.1333	upland	urea	0.0537083	dynamic chamber	99
115.483	38.8506	upland	urea	0.00813333	dynamic chamber	100
115.483	38.8506	upland	urea	0.0136	dynamic chamber	100
115.483	38.8506	upland	urea	0.0188889	dynamic chamber	100
115.483	38.8506	upland	urea	0.0261333	dynamic chamber	100
114.683	37.8833	upland	urea	0.0195	static chamber	101
114.683	37.8833	upland	urea	0.0057	static chamber	101
114.683	37.8833	upland	urea	0.019	static chamber	101
114.683	37.8833	upland	urea	0.0062	static chamber	101
114.683	37.8833	upland	urea	0.0276	static chamber	101
114.683	37.8833	upland	urea	0.0054	static chamber	101
114.683	37.8833	upland	urea	0.244076	dynamic chamber	102
114.683	37.8833	upland	urea	0.06175	dynamic chamber	102
108.083	34.25	upland	urea	0.155433	static chamber	103
108.067	34.2939	upland	urea	0.0535667	static chamber	104
117.151	36.1719	upland	urea	0.0301587	static chamber	105
117.151	36.1719	upland	urea	0.115443	static chamber	106
117.151	36.1719	upland	urea	0.125273	static chamber	106
108.067	34.3	upland	urea	0.0155556	static chamber	107
108.067	34.3	upland	urea	0.0188333	static chamber	108
119.28	32	upland	urea	0.00333333	dynamic chamber	109
119.28	32	upland	urea	0.00293333	dynamic chamber	109
115.783	38.1333	upland	urea	0.0583333	dynamic chamber	110
115.783	38.1333	upland	urea	0.0805833	dynamic chamber	110
115.783	38.1333	upland	urea	0.0716667	dynamic chamber	110
115.783	38.1333	upland	urea	0.0970833	dynamic chamber	110
120.699	31.55	upland	urea	0.0505185	dynamic chamber	111
120.699	31.55	upland	urea	0.0462222	dynamic chamber	111
120.699	31.55	upland	urea	0.0526222	dynamic chamber	111
87.7792	44.5906	upland	urea	0.00670627	static chamber	112
87.7792	44.5906	upland	urea	0.00604915	static chamber	112
87.7792	44.5906	upland	urea	0.0154469	static chamber	112
87.7792	44.5906	upland	urea	0.0194887	static chamber	112
119.78	31.37	upland	urea	0.028	static chamber	113
119.78	31.37	upland	urea	0.033037	static chamber	113
119.78	31.37	upland	urea	0.0493889	static chamber	113
119.78	31.37	upland	urea	0.0644444	static chamber	113
119.78	31.37	upland	urea	0.0507917	static chamber	113
119.78	31.37	upland	urea	0.0342667	static chamber	113
114.312	30.4875	upland	urea	0.0520635	dynamic chamber	40
114.312	30.4875	upland	urea	0.0543111	dynamic chamber	40
115.32	38.01	upland	urea	0.0508571	dynamic chamber	114
115.32	38.01	upland	urea	0.0563667	dynamic chamber	114
115.32	38.01	upland	urea	0.0845238	dynamic chamber	114
115.32	38.01	upland	urea	0.0939167	dynamic chamber	115
114.4	35	upland	urea	0.0577333	dynamic chamber	115
114.4	35	upland	urea	0.0522	dynamic chamber	115
114.4	35	upland	urea	0.0960667	dynamic chamber	115
116.23	39.29	upland	urea	0.266133	static chamber	116
116.23	39.29	upland	urea	0.24808	static chamber	116
116.23	39.29	upland	urea	0.20312	static chamber	116
116.23	39.29	upland	urea	0.35112	static chamber	116
116.23	39.29	upland	urea	0.123467	static chamber	116
116.23	39.29	upland	urea	0.119387	static chamber	116
116.23	39.29	upland	urea	0.127813	static chamber	116
108.07	34.2931	upland	urea	0.00826667	static chamber	117
108.07	34.2931	upland	urea	0.00671111	static chamber	117
-47.6167	-22.5833	upland	urea	0.0428852	static chamber	118
-47.6167	-22.5833	upland	urea	0.189936	static chamber	118
-47.6167	-22.5833	upland	urea	0.200597	static chamber	118
-47.6167	-22.5833	upland	urea	0.214146	static chamber	118
-47.6167	-22.5833	upland	urea	0.0422148	static chamber	118
-47.6167	-22.5833	upland	urea	0.101244	static chamber	118
-47.6167	-22.5833	upland	urea	0.093524	static chamber	118
-47.6167	-22.5833	upland	urea	0.135896	static chamber	118
-47.9833	-19.4167	upland	urea	0.317778	static chamber	119
-47.9833	-19.4167	upland	urea	0.379259	static chamber	119
-47.9833	-19.4167	upland	urea	0.295556	static chamber	119
119.5	39.95	upland	urea	0.0418333	static chamber	120
119.5	39.95	upland	urea	0.0708333	static chamber	120
119.5	39.95	upland	urea	0.188667	static chamber	120
119.5	39.95	upland	urea	0.111667	static chamber	120
119.5	39.95	upland	urea	0.0966667	static chamber	120
119.5	39.95	upland	urea	0.0983333	static chamber	120
114.4	35	upland	urea	0.0625933	static chamber	121
114.4	35	upland	urea	0.0399421	static chamber	121
114.4	35	upland	urea	0.0412565	static chamber	121
114.4	35	upland	urea	0.0662556	static chamber	121
114.4	35	upland	urea	0.0691933	static chamber	121
114.4	35	upland	urea	0.0573	static chamber	121
114.4	35	upland	urea	0.102515	static chamber	121
114.4	35	upland	urea	0.115357	static chamber	121
114.4	35	upland	urea	0.187387	static chamber	121
114.4	35	upland	urea	0.213494	static chamber	121
114.4	35	upland	urea	0.015154	static chamber	121
114.4	35	upland	urea	0.0151216	static chamber	121
114.4	35	upland	urea	0.01597	static chamber	121
114.4	35	upland	urea	0.0399004	static chamber	121
114.4	35	upland	urea	0.00716933	static chamber	121
114.4	35	upland	urea	0.00723895	static chamber	121
114.4	35	upland	urea	0.00842741	static chamber	121
114.4	35	upland	urea	0.008766	static chamber	121
114.4	35	upland	urea	0.00849947	static chamber	121
114.4	35	upland	urea	0.00745609	static chamber	121
114.4	35	upland	urea	0.0137589	static chamber	121
114.4	35	upland	urea	0.08372	static chamber	121
114.4	35	upland	urea	0.0476737	static chamber	121
114.4	35	upland	urea	0.0915565	static chamber	121
114.4	35	upland	urea	0.0961407	static chamber	121
114.4	35	upland	urea	0.08584	static chamber	121
114.4	35	upland	urea	0.11352	static chamber	121
114.4	35	upland	urea	0.122258	static chamber	121
114.4	35	upland	urea	0.0478867	static chamber	121
114.4	35	upland	urea	0.0504368	static chamber	121
114.4	35	upland	urea	0.0421	static chamber	121
114.4	35	upland	urea	0.0566037	static chamber	121
114.4	35	upland	urea	0.020662	static chamber	121
114.4	35	upland	urea	0.0126279	static chamber	121
114.4	35	upland	urea	0.0130404	static chamber	121
114.4	35	upland	urea	0.0333307	static chamber	121
114.4	35	upland	urea	0.0269313	static chamber	121
114.4	35	upland	urea	0.0491563	static chamber	121
114.4	35	upland	urea	0.0719117	static chamber	121
114.4	35	upland	urea	0.0764433	static chamber	121
114.4	35	upland	urea	0.0234373	static chamber	121
114.4	35	upland	urea	0.0258716	static chamber	121
114.4	35	upland	urea	0.0319096	static chamber	121
114.4	35	upland	urea	0.0102007	static chamber	121
114.4	35	upland	urea	0.0185795	static chamber	121
114.4	35	upland	urea	0.015667	static chamber	121
108.067	34.2667	upland	urea	0.0620713	dynamic chamber	122
108.067	34.2667	upland	urea	0.0846279	dynamic chamber	122
112.2	36.9667	upland	urea	0.13086	dynamic chamber	122
112.2	36.9667	upland	urea	0.177621	dynamic chamber	122
77.2	28.6667	upland	urea	0.1	micrometeorological method	50
-51.4833	-23.2833	upland	organic N fertilizer	0.116667	static chamber	123
-51.4833	-23.2833	upland	organic N fertilizer	0.220833	static chamber	123
-51.4833	-23.2833	upland	organic N fertilizer	0.186905	static chamber	123
-51.4833	-23.2833	upland	organic N fertilizer	0.175	static chamber	123
-51.4833	-23.2833	upland	organic N fertilizer	0.1	static chamber	123
-51.4833	-23.2833	upland	organic N fertilizer	0.1375	static chamber	123
-51.4833	-23.2833	upland	organic N fertilizer	0.160714	static chamber	123
-51.4833	-23.2833	upland	organic N fertilizer	0.156667	static chamber	123
141.9	-36.3667	upland	organic N fertilizer	0.095	micrometeorological method	124
141.983	-35.1167	upland	organic N fertilizer	0.0543478	micrometeorological method	125
141.983	-35.1167	upland	ammonium-nitrate-based	0.0184783	micrometeorological method	125
142.5	-10.1333	upland	organic N fertilizer	0.230435	micrometeorological method	125
142.5	-10.1333	upland	organic N fertilizer	0.190217	micrometeorological method	125
142.5	-10.1333	upland	ammonium-nitrate-based	0.123913	micrometeorological method	125
142.5	-10.1333	upland	ammonium-based	0.121739	micrometeorological method	125
142.5	-10.1333	upland	organic N fertilizer	0.126087	micrometeorological method	125
142.5	-10.1333	upland	organic N fertilizer	0.16087	micrometeorological method	125
142.5	-10.1333	upland	ammonium-based	0.0282609	micrometeorological method	125
-43.65	-22.8167	upland	organic N fertilizer	0.0269401	static chamber	126
77.2	28.6667	upland	urea	0.301667	static chamber	60
77.2	28.6667	upland	organic N fertilizer	0.261667	static chamber	60
2.05577	13.528	upland	organic N fertilizer	0.112527	static chamber	127
2.05577	13.528	upland	organic N fertilizer	0.118896	static chamber	127
2.09594	13.5465	upland	organic N fertilizer	0.0616967	static chamber	127
-0.83	44.5	upland	ammonium-based	0.00107143	micrometeorological method	128	Bouwman
2.96667	49.85	upland	ammonium-based	0.29	static chamber	129	Bouwman
2.96667	49.85	upland	ammonium-based	0.085	static chamber	129	Bouwman
2.96667	49.85	upland	ammonium-based	0.098	static chamber	129	Bouwman
2.96667	49.85	upland	ammonium-based	0.277	static chamber	129	Bouwman
2.96667	49.85	upland	ammonium-based	0.307	static chamber	129	Bouwman
2.96667	49.85	upland	ammonium-nitrate-based	0.12	static chamber	129	Bouwman
2.96667	49.85	upland	ammonium-nitrate-based	0.057	static chamber	129	Bouwman
2.96667	49.85	upland	ammonium-nitrate-based	0.099	static chamber	129	Bouwman
2.96667	49.85	upland	urea	0.239	static chamber	129	Bouwman
2.96667	49.85	upland	urea	0.078	static chamber	129	Bouwman
2.96667	49.85	upland	urea	0.139	static chamber	129	Bouwman
2.96667	49.85	upland	ammonium-nitrate-based	0.087	static chamber	129	Bouwman
2.96667	49.85	upland	ammonium-nitrate-based	0.039	static chamber	129	Bouwman
2.96667	49.85	upland	ammonium-nitrate-based	0.063	static chamber	129	Bouwman
2.96667	49.85	upland	ammonium-based	0.183	static chamber	129	Bouwman
2.96667	49.85	upland	ammonium-based	0.23	static chamber	129	Bouwman
2.96667	49.85	upland	ammonium-based	0.257	static chamber	129	Bouwman
2.96667	49.85	upland	ammonium-based	0.349	static chamber	129	Bouwman
2.96667	49.85	upland	ammonium-based	0.24	static chamber	129	Bouwman
2.96667	49.85	upland	ammonium-based	0.275	static chamber	129	Bouwman
-96.57	39.18	upland	ammonium-nitrate-based	0.1655	micrometeorological method	130	Bouwman
-96.57	39.18	upland	ammonium-nitrate-based	0.0755	micrometeorological method	130	Bouwman
-73.58	45.51	upland	ammonium-nitrate-based	0.0093	static chamber	131	Bouwman
-73.58	45.51	upland	ammonium-nitrate-based	0.0103	static chamber	131	Bouwman
-73.58	45.51	upland	ammonium-nitrate-based	0.0209	static chamber	131	Bouwman
-73.58	45.51	upland	ammonium-nitrate-based	0.0208	static chamber	131	Bouwman
-73.58	45.51	upland	ammonium-nitrate-based	0.011	static chamber	131	Bouwman
-73.58	45.51	upland	ammonium-nitrate-based	0.0125	static chamber	131	Bouwman
-73.58	45.51	upland	ammonium-nitrate-based	0.0372	static chamber	131	Bouwman
-73.58	45.51	upland	ammonium-nitrate-based	0.0324	static chamber	131	Bouwman
-73.58	45.51	upland	ammonium-nitrate-based	0.0144	static chamber	131	Bouwman
-73.58	45.51	upland	ammonium-nitrate-based	0.0144	static chamber	131	Bouwman
-73.58	45.51	upland	ammonium-nitrate-based	0.0734	static chamber	131	Bouwman
-73.58	45.51	upland	ammonium-nitrate-based	0.0601	static chamber	131	Bouwman
-73.58	45.51	upland	ammonium-nitrate-based	0.0159	static chamber	131	Bouwman
-73.58	45.51	upland	ammonium-nitrate-based	0.0166	static chamber	131	Bouwman
-73.58	45.51	upland	ammonium-nitrate-based	0.0318	static chamber	131	Bouwman
-73.58	45.51	upland	ammonium-nitrate-based	0.0309	static chamber	131	Bouwman
-73.58	45.51	upland	ammonium-nitrate-based	0.0271	static chamber	131	Bouwman
-73.58	45.51	upland	ammonium-nitrate-based	0.0191	static chamber	131	Bouwman
-73.58	45.51	upland	ammonium-nitrate-based	0.0423	static chamber	131	Bouwman
-73.58	45.51	upland	ammonium-nitrate-based	0.0403	static chamber	131	Bouwman
-73.58	45.51	upland	ammonium-nitrate-based	0.0315	static chamber	131	Bouwman
-73.58	45.51	upland	ammonium-nitrate-based	0.0196	static chamber	131	Bouwman
-73.58	45.51	upland	ammonium-nitrate-based	0.0801	static chamber	131	Bouwman
-73.58	45.51	upland	ammonium-nitrate-based	0.0671	static chamber	131	Bouwman
-73.58	45.51	upland	ammonium-nitrate-based	0.0179	static chamber	131	Bouwman
-73.58	45.51	upland	organic N fertilizer	0.0179	static chamber	131	Bouwman
-73.58	45.51	upland	organic N fertilizer	0.0247	static chamber	131	Bouwman
-97.1	32.7333	upland	ammonium-nitrate-based	0.03	static chamber	132	Bouwman
-97.1	32.7333	upland	urea	0.24	static chamber	132	Bouwman
-97.1	32.7333	upland	ammonium-nitrate-based	0.12	static chamber	132	Bouwman
-97.1	32.7333	upland	urea	0.31	static chamber	132	Bouwman
-97.1	32.7333	upland	ammonium-nitrate-based	0.02	static chamber	132	Bouwman
-97.1	32.7333	upland	urea	0.19	static chamber	132	Bouwman
-97.1	32.7333	upland	ammonium-nitrate-based	0.16	static chamber	132	Bouwman
-97.1	32.7333	upland	urea	0.26	static chamber	132	Bouwman
-97.1	32.7333	upland	urea	0.05	static chamber	132	Bouwman
-97.1	32.7333	upland	urea	0.09	static chamber	132	Bouwman
-97.1	32.7333	upland	urea	0.26	static chamber	132	Bouwman
-90.7167	42.85	upland	ammonium-nitrate-based	0.01	static chamber	132	Bouwman
-90.7167	42.85	upland	urea	0.08	static chamber	132	Bouwman
-90.7167	42.85	upland	ammonium-nitrate-based	0.02	static chamber	132	Bouwman
-90.7167	42.85	upland	urea	0.08	static chamber	132	Bouwman
-90.7167	42.85	upland	urea	0.03	static chamber	132	Bouwman
-90.7167	42.85	upland	urea	0.03	static chamber	132	Bouwman
-90.7167	42.85	upland	ammonium-nitrate-based	0.01	static chamber	132	Bouwman
-90.7167	42.85	upland	urea	0.18	static chamber	132	Bouwman
-90.7167	42.85	upland	ammonium-nitrate-based	0.05	static chamber	132	Bouwman
-90.7167	42.85	upland	urea	0.12	static chamber	132	Bouwman
-90.7167	42.85	upland	urea	0.04	static chamber	132	Bouwman
-90.7167	42.85	upland	urea	0.05	static chamber	132	Bouwman
-90.7167	42.85	upland	urea	0.12	static chamber	132	Bouwman
-90.7167	42.85	upland	ammonium-nitrate-based	0.01	static chamber	132	Bouwman
-90.7167	42.85	upland	urea	0.19	static chamber	132	Bouwman
-90.7167	42.85	upland	urea	0.09	static chamber	132	Bouwman
-90.7167	42.85	upland	ammonium-nitrate-based	0.01	static chamber	132	Bouwman
-90.7167	42.85	upland	urea	0.09	static chamber	132	Bouwman
-90.7167	42.85	upland	urea	0.04	static chamber	132	Bouwman
172.47	-43.65	upland	urea	0.211	static chamber	132	Bouwman
172.47	-43.65	upland	urea	0.131	static chamber	132	Bouwman
172.47	-43.65	upland	urea	0.01	static chamber	132	Bouwman
172.47	-43.65	upland	ammonium-based	0.006	static chamber	132	Bouwman
172.47	-43.65	upland	urea	0.241	static chamber	132	Bouwman
172.47	-43.65	upland	urea	0.21	static chamber	132	Bouwman
172.47	-43.65	upland	urea	0.29	static chamber	132	Bouwman
172.47	-43.65	upland	urea	0.212	static chamber	132	Bouwman
-85.48	32.61	upland	urea	0.152985	static chamber	133	Bouwman
-85.48	32.61	upland	ammonium-nitrate-based	0.00186567	static chamber	133	Bouwman
146.417	-30.5833	upland	urea	0.0125	micrometeorological method	134	Bouwman
73	26.25	upland	urea	0.145	dynamic chamber	135	Bouwman
73	26.25	upland	urea	0.13	dynamic chamber	135	Bouwman
73	26.25	upland	urea	0.08	dynamic chamber	135	Bouwman
73	26.25	upland	urea	0.11	dynamic chamber	135	Bouwman
73	26.25	upland	urea	0.11	dynamic chamber	135	Bouwman
73	26.25	upland	urea	0.06	dynamic chamber	135	Bouwman
73	26.25	upland	urea	0.08	dynamic chamber	135	Bouwman
-98.81	53.76	upland	urea	0.23	static chamber	136	Bouwman
146.417	-35.5833	upland	urea	0.165	dynamic chamber	137	Bouwman
146.417	-35.5833	upland	urea	0.12	dynamic chamber	137	Bouwman
146.417	-35.5833	upland	urea	0.075	dynamic chamber	137	Bouwman
146.417	-35.5833	upland	urea	0.073	dynamic chamber	137	Bouwman
146.417	-35.5833	upland	urea	0.16	dynamic chamber	137	Bouwman
146.417	-35.5833	upland	urea	0.15	dynamic chamber	137	Bouwman
146.417	-35.5833	upland	urea	0.04	dynamic chamber	137	Bouwman
146.417	-35.5833	upland	urea	0.335	dynamic chamber	137	Bouwman
146.417	-35.5833	upland	urea	0.275	dynamic chamber	137	Bouwman
146.417	-35.5833	upland	urea	0.2725	dynamic chamber	137	Bouwman
146.417	-35.5833	upland	urea	0.2	dynamic chamber	137	Bouwman
146.417	-35.5833	upland	urea	0.363	dynamic chamber	137	Bouwman
146.417	-35.5833	upland	urea	0.067	dynamic chamber	137	Bouwman
146.417	-35.5833	upland	urea	0.036	dynamic chamber	137	Bouwman
149.19	-21.14	upland	urea	0.3225	micrometeorological method	138	Bouwman
149.19	-21.14	upland	ammonium-based	0.005625	micrometeorological method	138	Bouwman
147.41	-19.58	upland	urea	0.003125	micrometeorological method	138	Bouwman
147.41	-19.58	upland	ammonium-based	0.004375	micrometeorological method	138	Bouwman
146.15	-18.65	upland	urea	0.39	micrometeorological method	138	Bouwman
146.15	-18.65	upland	ammonium-based	0.018125	micrometeorological method	138	Bouwman
145.92	-17.93	upland	urea	0.168125	micrometeorological method	138	Bouwman
145.92	-17.93	upland	ammonium-based	0.006875	micrometeorological method	138	Bouwman
-96.57	39.18	upland	urea	0.0416667	dynamic chamber	139	Bouwman
-96.57	39.18	upland	urea	0.0666667	dynamic chamber	139	Bouwman
-96.57	39.18	upland	urea	0.0625	dynamic chamber	139	Bouwman
-96.57	39.18	upland	urea	0.0916667	dynamic chamber	139	Bouwman
-96.57	39.18	upland	urea	0.0583333	dynamic chamber	139	Bouwman
-96.57	39.18	upland	urea	0.166667	dynamic chamber	139	Bouwman
-96.57	39.18	upland	ammonium-nitrate-based	0.011	dynamic chamber	139	Bouwman
-96.57	39.18	upland	ammonium-nitrate-based	0.075	dynamic chamber	139	Bouwman
-96.57	39.18	upland	ammonium-nitrate-based	0.01	dynamic chamber	139	Bouwman
-96.57	39.18	upland	ammonium-nitrate-based	0.165	dynamic chamber	139	Bouwman
146.41	-34.61	upland	urea	0.014	micrometeorological method	140	Bouwman
146.41	-34.61	upland	urea	0.01	micrometeorological method	140	Bouwman
146.41	-34.61	upland	urea	0.245	micrometeorological method	140	Bouwman
146.41	-34.61	upland	urea	0.004	micrometeorological method	140	Bouwman
146.41	-34.61	upland	urea	0.006	micrometeorological method	140	Bouwman
146.41	-34.61	upland	urea	0.118	micrometeorological method	140	Bouwman
146.41	-34.61	upland	urea	0.013	micrometeorological method	140	Bouwman
32.48	37.87	upland	ammonium-based	0.1398	dynamic chamber	141	Bouwman
32.48	37.87	upland	ammonium-nitrate-based	0.044	dynamic chamber	141	Bouwman
32.48	37.87	upland	urea	0.106	dynamic chamber	141	Bouwman
-72.9	45.64	upland	urea	0.082	static chamber	142	Bouwman
-72.9	45.64	upland	urea	0.04	static chamber	142	Bouwman
-72.9	45.64	upland	urea	0.065	static chamber	142	Bouwman
-72.9	45.64	upland	urea	0.037	static chamber	142	Bouwman
-72.9	45.64	upland	urea	0.034	static chamber	142	Bouwman
-72.9	45.64	upland	urea	0.029	static chamber	142	Bouwman
-72.9	45.64	upland	urea	0.056	static chamber	142	Bouwman
-72.9	45.64	upland	urea	0.033	static chamber	142	Bouwman
-72.9	45.64	upland	urea	0.027	static chamber	142	Bouwman
-72.9	45.64	upland	urea	0.05	static chamber	142	Bouwman
-72.9	45.64	upland	urea	0.033	static chamber	142	Bouwman
-72.9	45.64	upland	urea	0.04	static chamber	142	Bouwman
-72.9	45.64	upland	urea	0.031	static chamber	142	Bouwman
-72.9	45.64	upland	urea	0.025	static chamber	142	Bouwman
-72.9	45.64	upland	urea	0.023	static chamber	142	Bouwman
-72.9	45.64	upland	urea	0.032	static chamber	142	Bouwman
-72.9	45.64	upland	urea	0.024	static chamber	142	Bouwman
-72.9	45.64	upland	urea	0.022	static chamber	142	Bouwman
-73.98	45.09	upland	urea	0.031	static chamber	142	Bouwman
-73.98	45.09	upland	urea	0.022	static chamber	142	Bouwman
-73.98	45.09	upland	urea	0.026	static chamber	142	Bouwman
-73.98	45.09	upland	urea	0.02	static chamber	142	Bouwman
-73.98	45.09	upland	urea	0.018	static chamber	142	Bouwman
-73.98	45.09	upland	urea	0.016	static chamber	142	Bouwman
-73.98	45.09	upland	urea	0.025	static chamber	142	Bouwman
-73.98	45.09	upland	urea	0.016	static chamber	142	Bouwman
-73.98	45.09	upland	urea	0.014	static chamber	142	Bouwman
-73.98	45.09	upland	urea	0.027	static chamber	142	Bouwman
-73.98	45.09	upland	urea	0.028	static chamber	142	Bouwman
-73.98	45.09	upland	urea	0.023	static chamber	142	Bouwman
-73.98	45.09	upland	urea	0.017	static chamber	142	Bouwman
-73.98	45.09	upland	urea	0.015	static chamber	142	Bouwman
-73.98	45.09	upland	urea	0.014	static chamber	142	Bouwman
-73.98	45.09	upland	urea	0.018	static chamber	142	Bouwman
-73.98	45.09	upland	urea	0.014	static chamber	142	Bouwman
-73.98	45.09	upland	urea	0.013	static chamber	142	Bouwman
-84.26	33.25	upland	urea	0.36	dynamic chamber	143	Bouwman
-84.26	33.25	upland	urea	0.21	dynamic chamber	143	Bouwman
-84.26	33.25	upland	urea	0.35	dynamic chamber	143	Bouwman
-84.26	33.25	upland	urea	0.4	dynamic chamber	143	Bouwman
-84.26	33.25	upland	urea	0.4	dynamic chamber	143	Bouwman
-84.26	33.25	upland	urea	0.39	dynamic chamber	143	Bouwman
-84.26	33.25	upland	urea	0.38	dynamic chamber	143	Bouwman
-84.26	33.25	upland	urea	0.35	dynamic chamber	143	Bouwman
-84.26	33.25	upland	urea	0.38	dynamic chamber	143	Bouwman
-84.26	33.25	upland	urea	0.34	dynamic chamber	143	Bouwman
-84.26	33.25	upland	ammonium-nitrate-based	0.16	dynamic chamber	143	Bouwman
-84.26	33.25	upland	ammonium-nitrate-based	0.27	dynamic chamber	143	Bouwman
-84.26	33.25	upland	ammonium-nitrate-based	0.11	dynamic chamber	143	Bouwman
-84.26	33.25	upland	ammonium-nitrate-based	0.16	dynamic chamber	143	Bouwman
-84.26	33.25	upland	ammonium-nitrate-based	0.35	dynamic chamber	143	Bouwman
-84.26	33.25	upland	ammonium-nitrate-based	0.09	dynamic chamber	143	Bouwman
-84.26	33.25	upland	ammonium-nitrate-based	0.03	dynamic chamber	143	Bouwman
-84.26	33.25	upland	ammonium-nitrate-based	0.35	dynamic chamber	143	Bouwman
-84.26	33.25	upland	ammonium-nitrate-based	0.08	dynamic chamber	143	Bouwman
-84.26	33.25	upland	ammonium-nitrate-based	0.33	dynamic chamber	143	Bouwman
-84.26	33.25	upland	urea	0.09	dynamic chamber	143	Bouwman
-84.26	33.25	upland	urea	0.13	dynamic chamber	143	Bouwman
-84.26	33.25	upland	urea	0.18	dynamic chamber	143	Bouwman
-84.26	33.25	upland	urea	0.1	dynamic chamber	143	Bouwman
-84.26	33.25	upland	urea	0.22	dynamic chamber	143	Bouwman
-84.26	33.25	upland	urea	0.16	dynamic chamber	143	Bouwman
-84.26	33.25	upland	ammonium-nitrate-based	0.19	dynamic chamber	143	Bouwman
-84.26	33.25	upland	ammonium-nitrate-based	0.2	dynamic chamber	143	Bouwman
-84.26	33.25	upland	ammonium-nitrate-based	0.25	dynamic chamber	143	Bouwman
-84.26	33.25	upland	ammonium-nitrate-based	0.2	dynamic chamber	143	Bouwman
-84.26	33.25	upland	ammonium-nitrate-based	0.21	dynamic chamber	143	Bouwman
-84.26	33.25	upland	urea	0.2	dynamic chamber	143	Bouwman
-84.26	33.25	upland	urea	0.055	dynamic chamber	143	Bouwman
-84.26	33.25	upland	ammonium-nitrate-based	0.03	dynamic chamber	143	Bouwman
-84.26	33.25	upland	urea	0.14	dynamic chamber	144	Bouwman
-84.26	33.25	upland	urea	0.18	dynamic chamber	144	Bouwman
-84.26	33.25	upland	urea	0.41	dynamic chamber	144	Bouwman
-80.25	43.54	upland	organic N fertilizer	0.184615	micrometeorological method	145	Bouwman
-80.25	43.54	upland	organic N fertilizer	0.147287	micrometeorological method	145	Bouwman
-80.25	43.54	upland	organic N fertilizer	0.125	micrometeorological method	145	Bouwman
-96.57	39.18	upland	urea	0.0458333	micrometeorological method	146	Bouwman
-96.57	39.18	upland	urea	0.0891667	micrometeorological method	146	Bouwman
-96.57	39.18	upland	urea	0.17	micrometeorological method	146	Bouwman
-86.92	40.42	upland	urea	0.147	dynamic chamber	147	Bouwman
-86.92	40.42	upland	organic N fertilizer	0.025	dynamic chamber	147	Bouwman
-86.92	40.42	upland	organic N fertilizer	0.025	dynamic chamber	147	Bouwman
-86.92	40.42	upland	organic N fertilizer	0.14	dynamic chamber	147	Bouwman
-86.92	40.42	upland	organic N fertilizer	0.122	dynamic chamber	147	Bouwman
-86.92	40.42	upland	organic N fertilizer	0.112	dynamic chamber	147	Bouwman
172.47	-43.65	upland	organic N fertilizer	0.222	dynamic chamber	148	Bouwman
172.47	-43.65	upland	organic N fertilizer	0.337	dynamic chamber	148	Bouwman
172.47	-43.65	upland	organic N fertilizer	0.384	dynamic chamber	148	Bouwman
172.47	-43.65	upland	organic N fertilizer	0.246	dynamic chamber	148	Bouwman
172.47	-43.65	upland	organic N fertilizer	0.122	dynamic chamber	148	Bouwman
172.47	-43.65	upland	urea	0.179	dynamic chamber	148	Bouwman
172.47	-43.65	upland	urea	0.236	dynamic chamber	148	Bouwman
172.47	-43.65	upland	urea	0.361	dynamic chamber	148	Bouwman
172.47	-43.65	upland	urea	0.289	dynamic chamber	148	Bouwman
172.47	-43.65	upland	urea	0.085	dynamic chamber	148	Bouwman
6.61	53.17	upland	organic N fertilizer	0.33	micrometeorological method	149	Bouwman
6.61	53.17	upland	organic N fertilizer	0.18	micrometeorological method	149	Bouwman
6.61	53.17	upland	organic N fertilizer	0.065	micrometeorological method	149	Bouwman
6.61	53.17	upland	organic N fertilizer	0.065	micrometeorological method	149	Bouwman
9.21667	48.7	upland	organic N fertilizer	0.28	micrometeorological method	150	Bouwman
9.21667	48.7	upland	organic N fertilizer	0.225641	micrometeorological method	150	Bouwman
9.21667	48.7	upland	organic N fertilizer	0.217742	micrometeorological method	150	Bouwman
9.21667	48.7	upland	organic N fertilizer	0.190909	micrometeorological method	150	Bouwman
9.21667	48.7	upland	organic N fertilizer	0.28	micrometeorological method	150	Bouwman
9.21667	48.7	upland	organic N fertilizer	0.068	micrometeorological method	150	Bouwman
9.21667	48.7	upland	organic N fertilizer	0.0666667	micrometeorological method	150	Bouwman
-76.37	41.3	upland	urea	0.288806	micrometeorological method	151	Bouwman
-76.37	41.3	upland	urea	0.245522	micrometeorological method	151	Bouwman
-76.37	41.3	upland	urea	0.353731	micrometeorological method	151	Bouwman
-76.37	41.3	upland	ammonium-nitrate-based	0.140299	micrometeorological method	151	Bouwman
-76.37	41.3	upland	ammonium-nitrate-based	0.163433	micrometeorological method	151	Bouwman
-76.37	41.3	upland	ammonium-nitrate-based	0.180597	micrometeorological method	151	Bouwman
-76.37	41.3	upland	ammonium-nitrate-based	0.122388	micrometeorological method	151	Bouwman
-76.37	41.3	upland	ammonium-nitrate-based	0.127612	micrometeorological method	151	Bouwman
-76.37	41.3	upland	ammonium-nitrate-based	0.141045	micrometeorological method	151	Bouwman
11.57	49.95	upland	organic N fertilizer	0.2	micrometeorological method	152	Bouwman
11.57	49.95	upland	organic N fertilizer	0.25	micrometeorological method	152	Bouwman
11.57	49.95	upland	organic N fertilizer	0.18	micrometeorological method	152	Bouwman
11.57	49.95	upland	organic N fertilizer	0.3	micrometeorological method	152	Bouwman
11.57	49.95	upland	organic N fertilizer	0.22	micrometeorological method	152	Bouwman
11.57	49.95	upland	organic N fertilizer	0.18	micrometeorological method	152	Bouwman
11.57	49.95	upland	organic N fertilizer	0.37	micrometeorological method	152	Bouwman
11.57	49.95	upland	organic N fertilizer	0.38	micrometeorological method	152	Bouwman
—	—	upland	urea	0.187	dynamic chamber	153	Bouwman
—	—	upland	urea	0.248	dynamic chamber	153	Bouwman
—	—	upland	urea	0.189	dynamic chamber	153	Bouwman
79.4833	29.0167	upland	urea	0.240333	static chamber	154	Bouwman
79.4833	29.0167	upland	urea	0.1795	static chamber	154	Bouwman
79.4833	29.0167	upland	urea	0.204167	static chamber	154	Bouwman
79.4833	29.0167	upland	urea	0.145333	static chamber	154	Bouwman
79.4833	29.0167	upland	urea	0.166667	static chamber	154	Bouwman
79.4833	29.0167	upland	urea	0.104417	static chamber	154	Bouwman
79.4833	29.0167	upland	urea	0.189	static chamber	154	Bouwman
79.4833	29.0167	upland	urea	0.1435	static chamber	154	Bouwman
79.4833	29.0167	upland	urea	0.164167	static chamber	154	Bouwman
79.4833	29.0167	upland	urea	0.138833	static chamber	154	Bouwman
79.4833	29.0167	upland	urea	0.161333	static chamber	154	Bouwman
79.4833	29.0167	upland	urea	0.1575	static chamber	154	Bouwman
79.4833	29.0167	upland	urea	0.157611	static chamber	154	Bouwman
79.4833	29.0167	upland	urea	0.129875	static chamber	154	Bouwman
-58.38	-34.6	upland	urea	0.0883333	static chamber	155	Bouwman
-58.38	-34.6	upland	urea	0.0623333	static chamber	155	Bouwman
-58.38	-34.6	upland	urea	0.123333	static chamber	155	Bouwman
-58.38	-34.6	upland	urea	0.0943333	static chamber	155	Bouwman
0.0166667	51.5	upland	urea	0.236	static chamber	82	Bouwman
11.58	48.14	upland	organic N fertilizer	0.17027	dynamic chamber	156	Bouwman
11.58	48.14	upland	organic N fertilizer	0.017027	dynamic chamber	156	Bouwman
11.58	48.14	upland	organic N fertilizer	0.305556	dynamic chamber	156	Bouwman
11.58	48.14	upland	organic N fertilizer	0.244444	dynamic chamber	156	Bouwman
11.58	48.14	upland	organic N fertilizer	0.183333	dynamic chamber	156	Bouwman
11.58	48.14	upland	organic N fertilizer	0.183333	dynamic chamber	156	Bouwman
73.0167	26.2333	upland	urea	0.09	static chamber	157	Bouwman
73.0167	26.2333	upland	urea	0.15	static chamber	157	Bouwman
73.0167	26.2333	upland	urea	0.23	static chamber	157	Bouwman
9.61	56.51	upland	urea	0.298	dynamic chamber	158	Bouwman
9.61	56.51	upland	urea	0.284	dynamic chamber	158	Bouwman
9.61	56.51	upland	urea	0.241	dynamic chamber	158	Bouwman
9.61	56.51	upland	urea	0.194	dynamic chamber	158	Bouwman
9.61	56.51	upland	urea	0.094	dynamic chamber	158	Bouwman
9.61	56.51	upland	urea	0.168	dynamic chamber	158	Bouwman
2.96667	49.85	upland	ammonium-based	0.29	static chamber	129	Bouwman
2.96667	49.85	upland	ammonium-based	0.085	static chamber	129	Bouwman
2.96667	49.85	upland	ammonium-based	0.098	static chamber	129	Bouwman
2.96667	49.85	upland	ammonium-based	0.277	static chamber	129	Bouwman
2.96667	49.85	upland	ammonium-based	0.307	static chamber	129	Bouwman
2.96667	49.85	upland	urea	0.239	static chamber	129	Bouwman
2.96667	49.85	upland	urea	0.078	static chamber	129	Bouwman
2.96667	49.85	upland	urea	0.139	static chamber	129	Bouwman
2.96667	49.85	upland	ammonium-based	0.183	static chamber	129	Bouwman
2.96667	49.85	upland	ammonium-based	0.23	static chamber	129	Bouwman
2.96667	49.85	upland	ammonium-nitrate-based	0.087	static chamber	129	Bouwman
2.96667	49.85	upland	ammonium-nitrate-based	0.039	static chamber	129	Bouwman
2.96667	49.85	upland	ammonium-nitrate-based	0.063	static chamber	129	Bouwman
2.96667	49.85	upland	ammonium-based	0.257	static chamber	129	Bouwman
2.96667	49.85	upland	ammonium-based	0.349	static chamber	129	Bouwman
2.96667	49.85	upland	ammonium-based	0.12	static chamber	129	Bouwman
2.96667	49.85	upland	ammonium-based	0.057	static chamber	129	Bouwman
2.96667	49.85	upland	ammonium-based	0.099	static chamber	129	Bouwman
2.96667	49.85	upland	ammonium-based	0.24	static chamber	129	Bouwman
2.96667	49.85	upland	ammonium-based	0.275	static chamber	129	Bouwman
172.47	-43.65	upland	urea	0.211	dynamic chamber	159	Bouwman
172.47	-43.65	upland	urea	0.131	dynamic chamber	159	Bouwman
172.47	-43.65	upland	urea	0.29	dynamic chamber	159	Bouwman
172.47	-43.65	upland	urea	0.241	dynamic chamber	159	Bouwman
172.47	-43.65	upland	urea	0.21	dynamic chamber	159	Bouwman
-87.49	38.74	upland	urea	0.302976	dynamic chamber	160	Bouwman
-87.49	38.74	upland	urea	0.154762	dynamic chamber	160	Bouwman
-86.56	38.89	upland	urea	0.107143	dynamic chamber	160	Bouwman
-86.56	38.89	upland	urea	0.0577381	dynamic chamber	160	Bouwman
117.15	36.15	upland	urea	0.300977	static chamber	161
-86.92	40.42	upland	urea	0.07	dynamic chamber	162	Bouwman
-86.92	40.42	upland	urea	0.35	dynamic chamber	162	Bouwman
117.15	36.15	upland	urea	0.190586	static chamber	163
118	36.9833	upland	urea	0.308986	static chamber	164
116.683	41.0333	upland	urea	0.157502	static chamber	165
116.683	41.0333	upland	urea	0.123927	static chamber	165
117.151	36.1719	upland	urea	0.0301587	static chamber	166
108.067	34.2833	upland	urea	0.0664643	static chamber	167
108.067	34.2833	upland	urea	0.083375	static chamber	167
108.067	34.2833	upland	urea	0.069149	static chamber	167
18.1167	51.3167	upland	ammonium-based	0.075	static chamber	202	Bouwman
18.1167	51.3167	upland	ammonium-based	0.078	static chamber	202	Bouwman
18.1167	51.3167	upland	ammonium-based	0.226	static chamber	202	Bouwman
13.2833	55.6833	upland	organic N fertilizer	0.103437	static chamber	202	Bouwman
13.2833	55.6833	upland	organic N fertilizer	0.0944429	static chamber	202	Bouwman
13.2833	55.6833	upland	organic N fertilizer	0.170666	static chamber	202	Bouwman
13.2833	55.6833	upland	organic N fertilizer	0.0247466	static chamber	202	Bouwman
13.2667	55.6167	upland	organic N fertilizer	0.0117725	static chamber	202	Bouwman
13.2669	55.6169	upland	organic N fertilizer	0.00996132	static chamber	202	Bouwman
13.5667	55.4333	upland	organic N fertilizer	0.219057	static chamber	202	Bouwman
13.5667	55.4333	upland	organic N fertilizer	0.185356	static chamber	202	Bouwman
13.25	55.6333	upland	organic N fertilizer	0.0863997	static chamber	202	Bouwman
13.25	55.6333	upland	organic N fertilizer	0.0959996	static chamber	202	Bouwman
13.5667	55.4333	upland	organic N fertilizer	0.373138	static chamber	202	Bouwman
13.5667	55.4333	upland	organic N fertilizer	0.282375	static chamber	202	Bouwman
13.5667	55.4333	upland	organic N fertilizer	0.140515	static chamber	202	Bouwman
13.5667	55.4333	upland	organic N fertilizer	0.00591642	static chamber	202	Bouwman
13.5667	55.4333	upland	organic N fertilizer	0.00739553	static chamber	202	Bouwman
13.5333	55.4667	upland	organic N fertilizer	0.0408585	static chamber	202	Bouwman
13.5333	55.4667	upland	organic N fertilizer	0.0421765	Static chamber	202	Bouwman
124.486	43.2469	upland	urea	0.0606548	dynamic chamber	203
124.486	43.2469	upland	urea	0.0658333	dynamic chamber	203
124.486	43.2469	upland	urea	0.0740385	dynamic chamber	203
124.008	43.3382	upland	urea	0.0707143	dynamic chamber	203
124.008	43.3382	upland	urea	0.076375	dynamic chamber	203
124.008	43.3382	upland	urea	0.0865064	dynamic chamber	203
124.084	43.3634	upland	urea	0.112083	dynamic chamber	203
124.084	43.3634	upland	urea	0.11525	dynamic chamber	203
124.084	43.3634	upland	urea	0.126731	dynamic chamber	203

## Sheet: Supplementary Data 2
Supplementary Data 2: Data for simulating VR0
Lon (°)	Lat (°)	Crop	soil pH	Air Temperture (°C)	VR0	Country	Reference No.
—	—	bare	8	16.5	0.239	Belgium	129
—	—	bare	8	16.5	0.078	Belgium	129
—	—	bare	8	16.5	0.139	Belgium	129
79.49	29.02	rice	7.6	26	0.256667	India	68
79.49	29.02	rice	7.6	26	0.128333	India	68
79.49	29.02	rice	7.6	26	0.138333	India	68
79.49	29.02	rice	7.6	26	0.258333	India	68
79.49	29.02	rice	7.6	26	0.128333	India	68
79.49	29.02	rice	7.6	26	0.138333	India	68
79.49	29.02	rice	7.6	26	0.189	India	68
79.49	29.02	rice	7.6	26	0.0975	India	68
79.49	29.02	rice	7.6	26	0.0693333	India	68
79.49	29.02	rice	7.6	26	0.2345	India	68
79.49	29.02	rice	7.6	26	0.11975	India	68
79.49	29.02	rice	7.6	26	0.0808333	India	68
—	—	rice	5.9	25.8	0.036	India	73
—	—	rice	5.9	25.8	0.036	India	73
—	—	rice	5.9	25.8	0.06	India	73
—	—	rice	5.9	25.8	0.058	India	73
—	—	rice	5.9	25.8	0.045	India	73
—	—	rice	5.9	25.8	0.08	India	73
—	—	bare	7.5	29	0.236	India	82
—	—	bare	8.1	28.3	0.09	India	157
—	—	rice	7.5	29	0.152	India	82
—	—	rice	7.5	29	0.11	India	82
—	—	bare	8.1	28.3	0.15	India	157
—	—	bare	8.1	28.3	0.23	India	157
—	—	bare	6.2	27.8	0.187	India	153
—	—	bare	8.1	27.8	0.248	India	153
—	—	bare	8.1	27.8	0.189	India	153
172.47	-43.65	bare	6.1	20.6	0.211	New Zealand	159
172.47	-43.65	wheat	6.1	17.8	0.131	New Zealand	159
172.47	-43.65	bare	6.1	20.6	0.29	New Zealand	159
172.47	-43.65	wheat	6.1	20	0.241	New Zealand	159
172.47	-43.65	wheat	6.1	20	0.21	New Zealand	159
-87.49	38.74	maize	5.6	24	0.302976	USA	160
-87.49	38.74	maize	5.6	24	0.154762	USA	160
-86.56	38.89	maize	5.5	24	0.107143	USA	160
-86.56	38.89	maize	5.5	24	0.0577381	USA	160
—	—	maize	7.2	23.7	0.24	USA	132
—	—	maize	7.2	23.7	0.31	USA	132
—	—	maize	7.2	23.7	0.19	USA	132
—	—	maize	7.2	23.7	0.26	USA	132
—	—	maize	7.2	23.7	0.05	USA	132
—	—	maize	7.2	23.7	0.08	USA	132
—	—	maize	7.2	23.7	0.08	USA	132
—	—	maize	7.2	23.7	0.18	USA	132
—	—	maize	7.2	23.7	0.12	USA	132
—	—	maize	7.2	23.7	0.04	USA	132
-85.48	32.61	maize	6.3	23	0.152985	USA	133
-84.26	33.25	bare	6.1	22	0.055	USA	143
-86.92	40.42	bare	6.2	21.3	0.147	USA	147
-86.92	40.42	bare	5.7	25	0.07	USA	162
-86.92	40.42	bare	5.7	25	0.35	USA	162
-84.26	33.25	bare	6.1	22	0.2	USA	143
-72.9	45.64	maize	6.1	21.4	0.082	Canada	142
-72.9	45.64	maize	6.1	21.4	0.04	Canada	142
-72.9	45.64	maize	6.1	21.4	0.065	Canada	142
-72.9	45.64	maize	6.1	21.4	0.037	Canada	142
-72.9	45.64	maize	6.1	21.4	0.034	Canada	142
-72.9	45.64	maize	6.1	21.4	0.029	Canada	142
-72.9	45.64	maize	6.1	21.4	0.056	Canada	142
-72.9	45.64	maize	6.1	21.4	0.033	Canada	142
-72.9	45.64	maize	6.1	21.4	0.027	Canada	142
-72.9	45.64	maize	6.1	21.4	0.05	Canada	142
-72.9	45.64	maize	6.1	21.4	0.033	Canada	142
-72.9	45.64	maize	6.1	21.4	0.04	Canada	142
-72.9	45.64	maize	6.1	21.4	0.031	Canada	142
-72.9	45.64	maize	6.1	21.4	0.025	Canada	142
-72.9	45.64	maize	6.1	21.4	0.023	Canada	142
-72.9	45.64	maize	6.1	21.4	0.032	Canada	142
-72.9	45.64	maize	6.1	21.4	0.024	Canada	142
-72.9	45.64	maize	6.1	21.4	0.022	Canada	142
-73.98	45.09	maize	5.5	21.4	0.031	Canada	142
-73.98	45.09	maize	5.5	21.4	0.022	Canada	142
-73.98	45.09	maize	5.5	21.4	0.026	Canada	142
-73.98	45.09	maize	5.5	21.4	0.02	Canada	142
-73.98	45.09	maize	5.5	21.4	0.018	Canada	142
-73.98	45.09	maize	5.5	21.4	0.016	Canada	142
-73.98	45.09	maize	5.5	21.4	0.025	Canada	142
-73.98	45.09	maize	5.5	21.4	0.016	Canada	142
-73.98	45.09	maize	5.5	21.4	0.014	Canada	142
-73.98	45.09	maize	5.5	21.4	0.027	Canada	142
-73.98	45.09	maize	5.5	21.4	0.028	Canada	142
-73.98	45.09	maize	5.5	21.4	0.023	Canada	142
-73.98	45.09	maize	5.5	21.4	0.017	Canada	142
-73.98	45.09	maize	5.5	21.4	0.015	Canada	142
-73.98	45.09	maize	5.5	21.4	0.014	Canada	142
-73.98	45.09	maize	5.5	21.4	0.018	Canada	142
-73.98	45.09	maize	5.5	21.4	0.014	Canada	142
-73.98	45.09	maize	5.5	21.4	0.013	Canada	142
32.48	37.87	wheat	8.4	15	0.106	Turkey	141
121.25	14.17	rice	7	25.9	0.06	Philippines	75
121.25	14.17	rice	7	25.9	0.18	Philippines	75
-58.38	-34.6	maize	6	22	0.123333	Argentina	155
-58.38	-34.6	maize	6	22	0.0883333	Argentina	155
-47.9833	-19.4167	maize	5.7	25.3556	0.31581	Brazil	119
119.5	39.95	wheat	7.8	4.99364	0.0697833	China	120
119.5	39.95	maize	7.8	23.1762	0.0966667	China	120
100.05	26.0167	rice	7.46	14.56	0.17103	China	44
114.4	35	maize	8.3	26.0212	0.0557059	China	121
114.4	35	maize	8.3	26.0212	0.0875299	China	121
114.4	35	maize	8.3	26.0212	0.202065	China	121
114.4	35	wheat	8.3	10.7788	0.0311664	China	121
114.4	35	wheat	8.3	10.7788	0.0051	China	121
114.4	35	wheat	8.3	10.7788	0.0114857	China	121
114.4	35	maize	8.3	26.1914	0.0907242	China	121
114.4	35	maize	8.3	26.1914	0.116738	China	121
114.4	35	maize	8.3	26.1914	0.0517732	China	121
114.4	35	wheat	8.3	9.62493	0.0116	China	121
114.4	35	wheat	8.3	9.62493	0.0254363	China	121
114.4	35	wheat	8.3	9.62493	0.00275	China	121
114.4	35	maize	8.3	27.2639	0.0754036	China	121
114.4	35	maize	8.3	27.2639	0.030874	China	121
114.4	35	maize	8.3	27.2639	0.0162597	China	121
108.067	34.2667	wheat	7.7	21.1896	0.0823262	China	122
112.2	36.9667	wheat	8	20.5876	0.172849	China	122
120.7	31.55	rice	7.2	26.5902	0.217821	China	45
120.7	31.55	rice	7.2	26.5902	0.02425	China	45
119.4	32.4	rice	7.43	26.8683	0.26357	China	46
119.4	32.4	rice	7.19	26.8683	0.21762	China	46
111.867	26.75	rice	6.8	22.4477	0.305777	China	47
111.867	26.75	rice	6.8	22.9021	0.24222	China	47
111.867	26.75	rice	6.8	23.9912	0.24456	China	47
111.867	26.75	rice	6.8	25.9438	0.233251	China	47
119.9	31.2667	rice	6.25	24.2692	0.0641497	China	48
119.9	31.2667	rice	6.25	25.8063	0.230254	China	48
120.2	30.2667	rice	6.8	25.2506	0.0453875	China	49
120.2	30.2667	rice	6.8	25.2506	0.054475	China	49
120.635	31.6633	rice	5.39	28	0.203	China	1
120.183	31.3667	rice	7.07	29.35	0.114889	China	2
120.667	30.8333	rice	6.78	29.35	0.0956667	China	2
120.3	30.5	rice	7.17	29.65	0.136222	China	2
120.183	31.3667	rice	7.07	28.35	0.122778	China	2
120.667	30.8333	rice	6.78	28.35	0.110667	China	2
120.3	30.5	rice	7.17	29.1	0.152667	China	2
120.412	30.44	rice	7.41	23.36	0.0421141	China	6
120.67	30.83	rice	7.7	28.1	0.129433	China	11
120.699	31.55	rice	7.36	27.15	0.214033	China	14
120.699	31.55	rice	7.36	27.15	0.197	China	14
120.699	31.5458	rice	6.05	26.4	0.0336	China	16
120.63	31.55	rice	7.3	28	0.096189	China	19
115.907	23.3539	rice	5.24	25.4	0.0978017	China	20
115.907	23.3539	rice	5.24	29.0667	0.172945	China	20
106.267	38.1333	rice	8.58	22.2	0.210476	China	26
123.4	41.52	rice	6.97	22.9	0.0899254	China	27
117.767	31.65	rice	6.99	28.1	0.0608315	China	30
120.2	30.2667	rice	7.2	25.8333	0.045975	China	31
120.699	31.55	rice	7.3	28	0.108291	China	33
120.64	31.66	rice	5.23	28.9	0.044712	China	37
121.23	32.07	rice	7.36	27.4	0.0972222	China	38
121.23	32.07	rice	7.36	28.1	0.184683	China	38
120.1	31.5167	rice	6.99	25.4	0.161111	China	39
114.312	30.4875	rice	6.3	28.2	0.0866689	China	40
116.279	40.0255	wheat	7.9	7.275	0.0878562	China	89
120.699	31.5458	wheat	6.05	10.6857	0.00828947	China	16
117.15	36.15	wheat	7.89	0.642857	0.0960206	China	91
115.783	38.1333	wheat	8.6	5.14286	0.14272	China	93
120.63	31.55	wheat	7.3	6.55	0.0853324	China	19
115.783	38.1333	maize	7.8	25.7	0.0508	China	99
115.483	38.8506	wheat	7.8	7.9875	0.05152	China	100
114.683	37.8833	wheat	7.8	5.61429	0.03165	China	101
117.151	36.1719	wheat	7.51	10	0.0925051	China	106
117.15	36.15	maize	8.51	17.7	0.300977	China	161
115.783	38.1333	maize	8.6	25.7	0.0933333	China	110
120.699	31.55	wheat	7.35	6.12	0.0507937	China	111
119.78	31.37	wheat	6.7	9.96667	0.0232032	China	113
114.312	30.4875	wheat	6.3	10.6	0.0539128	China	40
115.32	38.01	maize	8.6	25.65	0.0922521	China	114
115.32	38.01	wheat	8.6	4.16667	0.221561	China	114
108.07	34.2931	wheat	8.5	7	0.00671111	China	117
124.008	43.3382	maize	6.16	20	0.0494984	China	203
124.084	43.3634	maize	6.71	20	0.0898029	China	203

## Sheet: Supplementary Data 3
Supplementary Data 3: Data for simulating correction coefficient for air temperture
Lon (°)	Lat (°)	Crop	Air Temperture (°C)	VR0	Correction coefficient	soil pH	Country	Measurement method	Reference No.
120.183	31.3667	rice	29.35	0.114889	2.46886	7.07	China	dynamic chamber	2
120.667	30.8333	rice	29.35	0.0956667	2.05579	6.78	China	dynamic chamber	2
120.3	30.5	rice	29.65	0.136222	2.92729	7.17	China	dynamic chamber	2
120.183	31.3667	rice	28.35	0.122778	2.63838	7.07	China	dynamic chamber	2
120.667	30.8333	rice	28.35	0.110667	2.37813	6.78	China	dynamic chamber	2
120.3	30.5	rice	29.1	0.152667	3.28067	7.17	China	dynamic chamber	2
120.412	30.44	rice	23.36	0.0421141	0.904994	7.41	China	static chamber	6
120.67	30.83	rice	28.1	0.129433	2.78141	7.7	China	dynamic chamber	11
120.699	31.55	rice	30	0.214033	4.59938	7.36	China	dynamic chamber	14
120.699	31.55	rice	30	0.197	4.23335	7.36	China	dynamic chamber	14
120.699	31.5458	rice	26.4	0.0336	0.722034	6.05	China	dynamic chamber	16
120.63	31.55	rice	28	0.096189	2.06702	7.3	China	dynamic chamber	19
117.767	31.65	rice	28.1	0.0608315	1.30721	6.99	China	static chamber	30
120.2	30.2667	rice	25.8333	0.045975	0.987961	7.2	China	static chamber	31
120.699	31.55	rice	28	0.108291	2.32707	7.3	China	dynamic chamber	33
121.23	32.07	rice	27.4	0.0972222	2.08922	7.36	China	dynamic chamber	38
121.23	32.07	rice	28.1	0.184683	3.96866	7.36	China	dynamic chamber	38
120.1	31.5167	rice	30	0.161111	3.46213	6.99	China	static chamber	39
114.312	30.4875	rice	28.2	0.0866689	1.86244	6.3	China	dynamic chamber	40
106.033	21.35	rice	25.1658	0.0700089	1.50443	5.2	Vietnam	dynamic chamber	52
85.93	20.45	rice	24.6	0.0183333	0.393967	6	Philippines	static chamber	59
77.2	28.6667	rice	26.5	0.118333	2.54288	8.1	India	static chamber	60
121.43	14.43	rice	26.6077	0.160954	3.45875	5.9	Philippines	micrometeorological method	61
121.32	14.15	rice	25.9707	0.0463936	0.996958	5.9	Philippines	micrometeorological method	61
120.29	15.89	rice	27.8	0.0371	0.797246	6.8	Philippines	micrometeorological method	61
79.49	29.02	rice	28.2	0.1903	4.08938	7.6	India	static chamber	68
79.49	29.02	rice	28.5	0.1975	4.2441	7.6	India	static chamber	68
121.32	14.15	rice	25.8803	0.0481405	1.0345	—	Philippines	micrometeorological method	74
120.15	14.97	rice	25.4364	0.0855519	1.83843	—	Philippines	micrometeorological method	74
120.15	14.97	rice	25.4364	0.0237487	0.510338	—	Philippines	micrometeorological method	74
115.55	29.85	rice	30	0.150904	3.24279	6.5	China	static chamber	43
120.2	30.2667	rice	25.2506	0.0453875	0.975337	6.8	China	static chamber	49
120.2	30.2667	rice	25.2506	0.054475	1.17062	6.8	China	static chamber	49
119.4	32.4	rice	26.8683	0.113084	2.43008	7.43	China	dynamic chamber	46
120.7	31.55	rice	26.5902	0.02425	0.521111	7.2	China	dynamic chamber	45
111.867	26.75	rice	28	0.136954	2.94301	6.8	China	dynamic chamber	47
111.867	26.75	rice	27.5	0.130621	2.80692	6.8	China	dynamic chamber	47
119.9	31.2667	rice	24.2692	0.0641497	1.37852	6.25	China	dynamic chamber	48
120.635	31.6633	rice	28	0.203	4.36229	5.39	China	dynamic chamber	1
120.699	31.5458	wheat	10.0893	0.00828947	0.0856552	6.05	China	dynamic chamber	16
117.15	36.15	wheat	13	0.0960206	0.992182	7.89	China	static chamber	91
115.783	38.1333	wheat	15.9	0.14272	1.47473	8.6	China	dynamic chamber	93
115.483	38.8506	wheat	14.569	0.05152	0.532357	7.8	China	dynamic chamber	100
114.683	37.8833	wheat	12.1731	0.03165	0.32704	7.8	China	static chamber	101
120.699	31.55	wheat	10.0736	0.0507937	0.524851	7.35	China	dynamic chamber	111
119.78	31.37	wheat	12.2152	0.0464063	0.479517	6.7	China	static chamber	113
115.32	38.01	wheat	16.7692	0.110781	1.1447	8.6	China	dynamic chamber	114
142.5	-10.1333	wheat	10	0.0612848	0.633256	7.8	Australia	micrometeorological method	125
77.2	28.6667	wheat	17	0.0991667	1.02469	8.1	India	static chamber	60
119.5	39.95	wheat	15.9	0.179783	1.8577	7.8	China	static chamber	120
114.4	35	wheat	11.1731	0.0311664	0.322043	8.28	China	static chamber	121
114.4	35	wheat	11.1731	0.0051	0.0526984	8.28	China	static chamber	121
114.4	35	wheat	11.1731	0.0114857	0.118682	8.28	China	static chamber	121
114.4	35	wheat	10.3538	0.0116	0.119863	8.28	China	static chamber	121
114.4	35	wheat	10.3538	0.0254363	0.262833	8.28	China	static chamber	121
114.4	35	wheat	11.5308	0.00275	0.0284158	8.28	China	static chamber	121
108.067	34.2667	wheat	17.0533	0.0823262	0.850678	7.7	China	dynamic chamber	122
112.2	36.9667	wheat	17.4588	0.172849	1.78605	8	China	dynamic chamber	122
116.279	40.0255	maize	25.8312	0.151451	1.56494	7.9	China	static chamber	89
117.15	36.15	maize	26.0625	0.219853	2.27174	7.89	China	static chamber	91
117.15	36.15	maize	25.1806	0.190586	1.96933	6.15	China	static chamber	163
118	36.9833	maize	25.6	0.308986	3.19276	8	China	static chamber	164
117.15	36.15	maize	25.8	0.300977	3.11	8.51	China	static chamber	161
115.32	38.01	maize	24.7245	0.0922521	0.953242	8.6	China	dynamic chamber	114
119.5	39.95	maize	25.2619	0.104167	1.07636	7.8	China	static chamber	120
114.4	35	maize	25.7423	0.202065	2.08794	8.28	China	static chamber	121
114.4	35	maize	24.8923	0.116738	1.20626	8.28	China	static chamber	121
116.683	41.0333	maize	25.5577	0.157502	1.62747	7.9	China	static chamber	165
116.683	41.0333	maize	25.2	0.123927	1.28054	7.9	China	static chamber	165
113.383	23.1667	vegetable	13.7	0.10888	1.12506	6.99	China	dynamic chamber	86
120.667	30.8333	oilseed rape	15.9333	0.0361111	0.373137	6.8	China	dynamic chamber	12
120.667	30.8333	oilseed rape	15.9333	0.055	0.568316	7.2	China	dynamic chamber	12
113.967	22.59	vegetable	23.7	0.211245	2.1828	5.2	China	dynamic chamber	96
119.78	31.37	wheat	23.4	0.111393	1.15103	6.7	China	static chamber	113
-47.6167	-22.5833	sugarcane	21.1818	0.104889	1.08382	4.6	Brazil	static chamber	118
-47.6167	-22.5833	sugarcane	21.1818	0.132553	1.36967	4.6	Brazil	static chamber	118
-84.26	33.25	sorghum	27.6863	0.265305	2.7414	6.1	USA	dynamic chamber	143
79.4833	29.0167	bare	17.8578	0.133	1.37429	6.12	India	static chamber	154
79.4833	29.0167	bare	17.9167	0.0988333	1.02125	6.12	India	static chamber	154
79.4833	29.0167	bare	17.0401	0.0579167	0.598454	6.12	India	static chamber	154
79.4833	29.0167	bare	16.5557	0.095	0.981636	6.12	India	static chamber	154

## Sheet: Supplementary Data 4
Supplementary Data 4: Data for simulating correction coefficient for soil or ponded water pH
Lon (°)	Lat (°)	Crop	soil pH	VR0	Correction coefficient	Air Temperture (°C)	Country	Measurement method	Reference No.
120.183	31.3667	rice	7.11934	0.114889	1.14256	29.35	China	dynamic chamber	2
120.667	30.8333	rice	6.82934	0.0956667	0.951398	29.35	China	dynamic chamber	2
120.3	30.5	rice	7.21934	0.136222	1.35472	29.65	China	dynamic chamber	2
120.183	31.3667	rice	7.11934	0.122778	1.22102	28.35	China	dynamic chamber	2
120.667	30.8333	rice	6.82934	0.110667	1.10057	28.35	China	dynamic chamber	2
120.3	30.5	rice	7.21934	0.152667	1.51826	29.1	China	dynamic chamber	2
120.67	30.83	rice	7.74934	0.129433	1.2872	28.1	China	dynamic chamber	11
120.699	31.55	rice	7.40934	0.214033	2.12855	30	China	dynamic chamber	14
120.699	31.55	rice	7.40934	0.197	1.95915	30	China	dynamic chamber	14
120.699	31.5458	rice	6.09934	0.0336	0.334149	26.4	China	dynamic chamber	16
120.63	31.55	rice	7.34934	0.096189	0.956592	28	China	dynamic chamber	19
117.767	31.65	rice	7.03934	0.0608315	0.604964	28.1	China	static chamber	30
120.2	30.2667	rice	7.24934	0.045975	0.457218	25.8333	China	static chamber	31
120.699	31.55	rice	7.34934	0.108291	1.07694	28	China	dynamic chamber	33
120.64	31.66	rice	5.27934	0.044712	0.444658	28.9	China	dynamic chamber	37
121.23	32.07	rice	7.40934	0.0972222	0.966868	27.4	China	dynamic chamber	38
121.23	32.07	rice	7.40934	0.184683	1.83665	28.1	China	dynamic chamber	38
120.1	31.5167	rice	7.03934	0.161111	1.60224	30	China	static chamber	39
114.312	30.4875	rice	6.34934	0.0866689	0.861916	28.2	China	dynamic chamber	40
85.93	20.45	rice	6.04934	0.0183333	0.182324	24.6	Philippines	static chamber	59
121.32	14.15	rice	5.94934	0.0463936	0.461381	25.9707	Philippines	micrometeorological method	61
120.29	15.89	rice	6.84934	0.0371	0.368957	27.8	Philippines	micrometeorological method	61
121.32	14.15	rice	6.14934	0.12377	1.23089	25.386	Philippines	micrometeorological method	63
79.49	29.02	rice	7.64934	0.1903	1.89252	28.2	India	static chamber	68
79.49	29.02	rice	7.64934	0.1975	1.96412	28.5	India	static chamber	68
115.55	29.85	rice	6.54934	0.150904	1.50073	30	China	static chamber	43
120.2	30.2667	rice	6.84934	0.0453875	0.451375	25.2506	China	static chamber	49
120.2	30.2667	rice	6.84934	0.054475	0.54175	25.2506	China	static chamber	49
119.4	32.4	rice	7.47934	0.113084	1.12461	26.8683	China	dynamic chamber	46
119.4	32.4	rice	7.23934	0.07002	0.696344	26.8683	China	dynamic chamber	46
100.05	26.0167	rice	7.50934	0.111074	1.10463	14.5602	China	dynamic chamber	44
111.867	26.75	rice	6.84934	0.171235	1.70292	22.4477	China	dynamic chamber	47
111.867	26.75	rice	6.84934	0.135643	1.34896	22.9021	China	dynamic chamber	47
111.867	26.75	rice	6.84934	0.136954	1.36199	28	China	dynamic chamber	47
111.867	26.75	rice	6.84934	0.130621	1.29901	27.5	China	dynamic chamber	47
119.9	31.2667	rice	6.29934	0.0641497	0.637964	24.2692	China	dynamic chamber	48
116.279	40.0255	wheat	7.9	0.0878562	1.65463	15.7	China	static chamber	89
120.699	31.5458	wheat	6.05	0.00828947	0.156119	10.0893	China	dynamic chamber	16
117.15	36.15	wheat	7.89	0.0960206	1.8084	13	China	static chamber	91
115.783	38.1333	wheat	8.6	0.14272	2.68791	15.9	China	dynamic chamber	93
115.483	38.8506	wheat	7.8	0.05152	0.970298	14.569	China	dynamic chamber	100
120.699	31.55	wheat	7.35	0.0507937	0.956618	10.0736	China	dynamic chamber	111
119.78	31.37	wheat	6.7	0.0464063	0.87399	12.2152	China	static chamber	113
115.32	38.01	wheat	8.6	0.110781	2.08638	16.7692	China	dynamic chamber	114
142.5	-10.1333	wheat	7.8	0.0612848	1.1542	10	Australia	micrometeorological method	125
77.2	28.6667	wheat	8.1	0.0991667	1.86765	17	India	static chamber	60
119.5	39.95	wheat	7.8	0.179783	3.38594	15.9	China	static chamber	120
108.067	34.2667	wheat	7.7	0.0823262	1.55048	17.0533	China	dynamic chamber	122
112.2	36.9667	wheat	8	0.172849	3.25534	17.4588	China	dynamic chamber	122
120.63	31.55	wheat	7.3	0.0853324	1.6071	2.23556	China	dynamic chamber	19
117.151	36.1719	wheat	7.51	0.0925051	1.74219	8.34048	China	static chamber	106
114.312	30.4875	wheat	6.3	0.0539128	1.01536	23.58	China	dynamic chamber	40
142.5	-10.1333	wheat	7.5	0.136163	2.56442	15	Australia	micrometeorological method	120
116.279	40.0255	maize	7.9	0.151451	2.85233	25.8312	China	static chamber	89
117.15	36.15	maize	7.89	0.219853	4.14058	26.0625	China	static chamber	91
118	36.9833	maize	8	0.308986	5.81927	25.6	China	static chamber	164
115.783	38.1333	maize	7.8	0.0508	0.956738	26.7417	China	dynamic chamber	99
117.151	36.1719	maize	6.1	0.0301587	0.567992	17.75	China	static chamber	166
117.15	36.15	maize	8.51	0.300977	5.66842	25.8	China	static chamber	161
115.783	38.1333	maize	8.6	0.0933333	1.75779	26.7417	China	dynamic chamber	110
115.32	38.01	maize	8.6	0.0922521	1.73742	24.7245	China	dynamic chamber	114
119.5	39.95	maize	7.8	0.104167	1.96181	25.2619	China	static chamber	120
114.4	35	maize	8.28	0.202065	3.80557	25.7423	China	static chamber	121
114.4	35	maize	8.28	0.116738	2.19858	24.8923	China	static chamber	121
114.4	35	maize	8.28	0.0754036	1.42011	28.1231	China	static chamber	121
116.683	41.0333	maize	7.9	0.157502	2.9663	25.5577	China	static chamber	165
116.683	41.0333	maize	7.9	0.123927	2.33397	25.2	China	static chamber	165
108.067	34.2833	maize	7.9	0.0664643	1.25175	24.4808	China	static chamber	167
108.067	34.2833	maize	7.9	0.083375	1.57024	24.6423	China	static chamber	167
108.067	34.2833	maize	7.9	0.069149	1.30231	24.6423	China	static chamber	167
113.383	23.1667	vegetable	6.99	0.10888	2.05058	13.7	China	dynamic chamber	86
120.667	30.8333	oilseed rape	6.8	0.0361111	0.680096	15.9333	China	dynamic chamber	12
120.667	30.8333	oilseed rape	7.2	0.055	1.03584	15.9333	China	dynamic chamber	12
116.92	28.2	vegetable	4.8	0.0140667	0.264923	24.75	China	dynamic chamber	97
119.28	32	vegetable	5.38	0.00293333	0.0552447	20.95	China	dynamic chamber	109
119.78	31.37	wheat	6.7	0.111393	2.09791	23.4	China	static chamber	113
-43.65	-22.8167	sugarcane	5.8	0.025	0.470836	27.5	Brazil	static chamber	121
79.4833	29.0167	bare	6.12	0.0579167	1.09077	17.0401	India	static chamber	154

## Sheet: Supplementary Data 5
Supplementary Data 5: Data for simulating correction coefficient for fertilizer type
Lon (°)	Lat (°)	Crop	VR of control	VR of treatment	N application rate (kg N ha-1)	Control	Treatment	Application mode	Country	Measurement method	Reference No.	Note
119.613	32.0159	rice	0.022	0.046	135	urea	ammonium bicarbonate	incorporation	China	micrometeorological method	168
119.613	32.0159	rice	0.022	0.093	135	urea	ammonium bicarbonate	incorporation	China	micrometeorological method	168
119.613	32.0159	rice	0.025	0.098	135	urea	ammonium bicarbonate	broadcast	China	micrometeorological method	168
119.613	32.0159	rice	0.032	0.126	90	urea	ammonium bicarbonate	broadcast	China	micrometeorological method	169
119.613	32.0159	rice	0.028	0.12	90	urea	ammonium bicarbonate	incorporation	China	micrometeorological method	169
119.613	32.0159	rice	0.028	0.063	90	urea	ammonium bicarbonate	incorporation	China	micrometeorological method	169
119.613	32.0159	rice	0.088	0.182	90	urea	ammonium bicarbonate	incorporation	China	micrometeorological method	169
119.963	30.0513	rice	0.058	0.12	60	urea	ammonium bicarbonate	incorporation	China	micrometeorological method	170
114.067	35.0167	rice	0.301	0.391	90	urea	ammonium bicarbonate	incorporation	China	micrometeorological method	171
113.204	28.1504	rice	0.1844	0.322	105	urea	ammonium bicarbonate	broadcast	China	dynamic chamber	172
113.204	28.1504	rice	0.2604	0.3557	126	urea	ammonium bicarbonate	broadcast	China	dynamic chamber	172
114.7	41.15	wheat	0.01	0.05	72.45	urea	ammonium bicarbonate	broadcast	China	micrometeorological method	173
108	34.28	wheat	0.0108	0.0446	100	urea	ammonium bicarbonate	broadcast	China	dynamic chamber	87
108	34.28	wheat	0.0029	0.001	100	urea	ammonium bicarbonate	broadcast	China	dynamic chamber	87
108	34.28	wheat	0.0203	0.0713	200	urea	ammonium bicarbonate	broadcast	China	dynamic chamber	87
108	34.28	wheat	0.0022	0.0018	200	urea	ammonium bicarbonate	broadcast	China	dynamic chamber	87
108	34.28	maize	0.023	0.0478	100	urea	ammonium bicarbonate	broadcast	China	dynamic chamber	87
108	34.28	maize	0.0144	0.0597	100	urea	ammonium bicarbonate	broadcast	China	dynamic chamber	87
108	34.28	maize	0.0076	0.006	100	urea	ammonium bicarbonate	incorporation	China	dynamic chamber	87
108	34.28	maize	0.0352	0.0593	200	urea	ammonium bicarbonate	broadcast	China	dynamic chamber	87
108	34.28	maize	0.0368	0.074	200	urea	ammonium bicarbonate	broadcast	China	dynamic chamber	87
108	34.28	maize	0.0129	0.028	200	urea	ammonium bicarbonate	incorporation	China	dynamic chamber	87
111.87	26.76	rice	0.377	0.182	150	urea	urea + manure	broadcast	China	dynamic chamber	41
111.87	26.76	rice	0.379	0.072	150	urea	urea + manure	broadcast	China	dynamic chamber	41
111.87	26.76	rice	0.414	0.199	150	urea	urea + manure	broadcast	China	dynamic chamber	41
111.87	26.76	rice	0.399	0.089	150	urea	urea + manure	broadcast	China	dynamic chamber	41
111.884	26.7619	rice	0.407	0.154	150	urea	urea + manure	broadcast	China	dynamic chamber	174
111.884	26.7619	rice	0.400667	0.148667	150	urea	urea + manure	broadcast	China	dynamic chamber	174
111.884	26.7619	rice	0.378667	0.126667	150	urea	urea + manure	broadcast	China	dynamic chamber	174
-94.1742	36.0693	rice	0.175	0.04	135	urea	ammonium sulphate	incorporation	USA	dynamic chamber	175
-94.1742	36.0693	rice	0.26	0.07	135	urea	ammonium sulphate	incorporation	USA	dynamic chamber	175
—	—	rice	0.5023	0.1432	94	urea	ammonium sulphate	incorporation	Philipplines	dynamic chamber	176	Pot experiment
—	—	rice	0.4868	0.1614	94	urea	ammonium sulphate	incorporation	Philipplines	dynamic chamber	176	Pot experiment
32.48	37.87	wheat	0.106	0.044	200	urea	ammonium nitrate	broadcast	Turkey	dynamic chamber	141
-84.26	33.25	wheat	0.21	0.16	90	urea	ammonium nitrate	broadcast	USA	dynamic chamber	143
-84.26	33.25	sorghum	0.35	0.27	135	urea	ammonium nitrate	broadcast	USA	dynamic chamber	143
-84.26	33.25	sorghum	0.37	0.31	135	urea	ammonium nitrate	broadcast	USA	dynamic chamber	143
-84.26	33.25	sorghum	0.31	0.16	90	urea	ammonium nitrate	broadcast	USA	dynamic chamber	143
-51.4843	-25.5606	maize	0.125	0.01	150	urea	ammonium nitrate	broadcast	Brazil	dynamic chamber	177
—	—	maize	0.026	0.0016	135	urea	ammonium sulphate	broadcast	USA	dynamic chamber	178
140.983	-35.1167	wheat	0.23	0.12	46	urea	ammonium sulphate	broadcast	Australia	micrometeorological method	179
140.983	-35.1167	wheat	0.13	0.028	46	urea	ammonium sulphate	broadcast	Australia	micrometeorological method	179
-51.4843	-25.5606	maize	0.125	0.019	150	urea	ammonium sulphate	broadcast	Brazil	dynamic chamber	177
—	—	maize	0.106	0.1398	200	urea	ammonium sulphate	broadcast	Turkey	dynamic chamber	176	Pot experiment
107.794	35.2146	vegetable	0.250583	0.186583	120	urea	urea + manure	incorporation	China	dynamic chamber	180
-85.48	32.61	maize	0.152985	0.00149254	134	urea	ammonium nitrate	broadcast	USA	static chamber	133
-47.4227	-21.9934	maize	0.04	0.000222222	100	urea	ammonium nitrate	applied in a band on the soil surface	Brazil	static chamber	181
172.47	-43.65	wheat	0.211	0.02	100	urea	ammonium sulphate	broadcast	New Zealand	micrometeorological method	159
-47.9	-22.0167	ryegrass	0.212	0.068	50	urea	ammonium nitrate	broadcast	Brazil	static chamber	182	Pot experiment
176.695	-40.3047	ryegrass	0.073	0.003	30	urea	ammonium sulphate	broadcast	New Zealand	static chamber	183
176.695	-40.3047	ryegrass	0.119	0.01	30	urea	ammonium sulphate	broadcast	New zealand	static chamber	184
172.47	-43.65	ryegrass	0.211	0.006	100	urea	ammonium sulphate	broadcast	New Zealand	micrometeorological method	159
-107.794	35.2146	maize	0.153	0.0018806	134	urea	ammonium nitrate	broadcast	USA	static chamber	180
-104.5	37.17	savannah grass	0.115167	0.0736667	168	urea	ammonium sulphate	—	Trinidad	static chamber	185
-104.5	37.17	savannah grass	0.044	0.0128333	168	urea	ammonium sulphate	—	Trinidad	static chamber	185
—	—	bare	0.473	0.34	15	urea	ammonium sulphate	broadcast	South Africa	static chamber	186
—	—	bare	0.427	0.28	30	urea	ammonium sulphate	broadcast	South Africa	static chamber	186
—	—	bare	0.38	0.247	60	urea	ammonium sulphate	broadcast	South Africa	static chamber	186
—	—	bare	0.311	0.193	120	urea	ammonium sulphate	broadcast	South Africa	static chamber	186
—	—	bare	0.26	0.15	240	urea	ammonium sulphate	broadcast	South Africa	static chamber	186
—	—	bare	0.637	0.407	15	urea	ammonium sulphate	broadcast	South Africa	static chamber	186
—	—	bare	0.533	0.32	30	urea	ammonium sulphate	broadcast	South Africa	static chamber	186
—	—	bare	0.432	0.29	60	urea	ammonium sulphate	broadcast	South Africa	static chamber	186
—	—	bare	0.37	0.262	120	urea	ammonium sulphate	broadcast	South Africa	static chamber	186
—	—	bare	0.319	0.2	240	urea	ammonium sulphate	broadcast	South Africa	static chamber	186
-47.4227	-21.9934	maize	0.162	0.008	100	urea	ammonium nitrate	broadcast	Brazil	static chamber	181
-46.7309	-23.5612	bare	0.0925	0.00333333	120	urea	ammonium nitrate	broadcast	Brazil	static chamber	187	Pot experiment
-46.05	-12	maize	0.058	0.0552	120	urea	ammonium sulphate	broadcast	Brazil	static chamber	188
—	—	wheat	0.156	0.006	133	urea	ammonium nitrate	broadcast	USA	static chamber	178
—	—	timothy	0.06048	0.0044	250	urea	ammonium sulphate	broadcast	Japan	dynamic chamber	189
—	—	bare	0.0741	0.002	100	urea	ammonium sulphate	broadcast	Netherlands	static chamber	190	Pot experiment
—	—	bare	0.0361	0.1015	100	urea	ammonium sulphate	broadcast	Netherlands	static chamber	190	Pot experiment
150	-30	bare	0.04825	0.0475	60	urea	ammonium nitrate	broadcast	Australia	micrometeorological method	191
150	-30	bare	0.1042	0.00386	100	urea	ammonium sulphate	broadcast	Australia	micrometeorological method	191
150	-30	bare	0.1115	0.06175	80	urea	ammonium sulphate	broadcast	Australia	micrometeorological method	191
150	-30	bare	0.2655	0.1135	100	urea	ammonium sulphate	broadcast	Australia	micrometeorological method	191
175.607	-40.3576	ryegrass	0.0999	0.0099	50	urea	ammonium sulphate	—	New Zealand	dynamic chamber	192
175.607	-40.3576	ryegrass	0.080025	0.002475	200	urea	ammonium sulphate	—	New Zealand	dynamic chamber	192
100.217	25.5667	winter wheat	0.0807111	0.008875	400	urea	manure	incorporation	China	dynamic chamber	201
100.217	25.5667	vegetable	0.0483111	0.005375	400	urea	manure	incorporation	China	dynamic chamber	201
100.217	25.5667	vegetable	0.0816444	0.008925	400	urea	manure	incorporation	China	dynamic chamber	201
100.217	25.5667	vegetable	0.0454667	0.005375	400	urea	manure	incorporation	China	dynamic chamber	201
—	—	—	0.0757167	0.00157667	120	urea	ammonium nitrate	—	Brazil	static chamber	204
—	—	—	0.0757167	0.00088	120	urea	ammonium sulphate	—	Brazil	static chamber	204
-51.4833	-25.55	wheat	0.0171	0.00494	50	urea	ammonium nitrate	broadcast	Brazil	static chamber	205
-51.4833	-25.55	maize	0.131333	0.004	150	urea	ammonium nitrate	broadcast	Brazil	static chamber	205
-51.4833	-25.55	wheat	0.0171	0.01102	50	urea	ammonium sulphate	broadcast	Brazil	static chamber	205
-51.4833	-25.55	maize	0.131333	0.009	150	urea	ammonium sulphate	broadcast	Brazil	static chamber	205

## Sheet: Supplementary Data 6
Supplementary Data 6: Data for simulating correction coefficient for fertilizer placement
Lon (°)	Lat (°)	Crop	VR of control	VR of treatment	N application rate (kg N ha-1)	Control	Treatment	Fertilizer type	Country	Measurement method	Reference No.	Note
121.32	14.15	rice	0.1628	0.1459	80	broadcast	incorpration	urea	Philippines	micrometeorological method	74
121.32	14.15	rice	0.36	0.2664	80	broadcast	incorpration	urea	Philippines	micrometeorological method	74
121.32	14.15	rice	0.27	0.18	53	broadcast	incorpration	urea	Philippines	micrometeorological method	74
119.613	32.0159	rice	0.098	0.093	90	broadcast	incorpration	ammonium bicarbonate	China	micrometeorological method	168
119.613	32.0159	rice	0.025	0.022	90	broadcast	incorpration	urea	China	micrometeorological method	168
119.613	32.0159	rice	0.032	0.028	90	broadcast	incorpration	urea	China	micrometeorological method	169
119.613	32.0159	rice	0.126	0.12	90	broadcast	incorpration	ammonium bicarbonate	China	micrometeorological method	169
119.963	30.0513	rice	0.108	0.07	60	broadcast	incorpration	urea	China	micrometeorological method	170
121.24	14.17	rice	0.27	0.13	150	broadcast	incorpration	urea	China	micrometeorological method	64
119.97	15.51	rice	0.48	0.42	53	broadcast	incorpration	urea	Philippines	micrometeorological method	61
119.97	15.51	rice	0.56	0.43	80	broadcast	incorpration	urea	Philippines	micrometeorological method	61
119.97	15.51	rice	0.27	0.12	53	broadcast	incorpration	urea	Philippines	micrometeorological method	61
119.97	15.51	rice	0.23	0.12	80	broadcast	incorpration	urea	Philippines	micrometeorological method	61
119.97	15.51	rice	0.14	0.1	53	broadcast	incorpration	urea	Philippines	micrometeorological method	61
119.97	15.51	rice	0.1	0.1	80	broadcast	incorpration	urea	Philippines	micrometeorological method	61
119.97	15.51	rice	0.26	0.3	53	broadcast	incorpration	urea	Philippines	micrometeorological method	61
119.97	15.51	rice	0.36	0.26	80	broadcast	incorpration	urea	Philippines	micrometeorological method	61
118.617	31.9333	rice	0.597	0.451	60	broadcast	incorpration	urea	China	dynamic chamber	193	Pot experiment
118.617	31.9333	rice	0.393	0.306	60	broadcast	incorpration	urea	China	dynamic chamber	193	Pot experiment
146.417	-35.5833	rice	0.363	0.149155	100	broadcast	incorpration	urea	Australia	dynamic chamber	137
146.417	-35.5833	rice	0.036	0	100	broadcast	incorpration	ammonium nitrate	Australia	dynamic chamber	137
114.559	35.0263	maize	0.48	0.11	200	broadcast	deep placement	urea	China	micrometeorological method	194
114.559	35.0263	maize	0.26	0.12	150	broadcast	deep placement	urea	China	micrometeorological method	194
114.559	35.0263	wheat	0.02	0.023	120	broadcast	deep placement	urea	China	micrometeorological method	194
114.559	35.0263	maize	0.3	0.12	80	broadcast	deep placement	urea	China	micrometeorological method	195
114.067	35.0167	maize	0.479	0.108	200	broadcast	deep placement	urea	China	micrometeorological method	196
114.067	35.0167	wheat	0.255	0.125	150	broadcast	deep placement	urea	China	micrometeorological method	196
108	34.28	maize	0.0187	0.0076	100	broadcast	deep placement	urea	China	dynamic chamber	87
108	34.28	maize	0.036	0.0129	200	broadcast	deep placement	urea	China	dynamic chamber	87
108	34.28	maize	0.05375	0.006	100	broadcast	deep placement	ammonium bicarbonate	China	dynamic chamber	87
108	34.28	maize	0.06665	0.028	200	broadcast	deep placement	ammonium bicarbonate	China	dynamic chamber	87
-51.4843	-25.5606	maize	0.013	0.001	150	broadcast	deep placement	urea	Brazil	dynamic chamber	177
-51.4843	-25.5606	maize	0.254	0.027	150	broadcast	deep placement	urea	Brazil	dynamic chamber	177
-51.4843	-25.5606	maize	0.201	0.016	150	broadcast	deep placement	urea	Brazil	dynamic chamber	177
126.917	47.45	bare	0.0952	0.0126	120	broadcast	deep placement	urea	China	dynamic chamber	197
126.917	47.45	bare	0.1572	0.0196	180	broadcast	deep placement	urea	China	dynamic chamber	197
126.917	47.45	bare	0.1481	0.0475	240	broadcast	deep placement	urea	China	dynamic chamber	197
126.917	47.45	bare	0.2168	0.0403	300	broadcast	deep placement	urea	China	dynamic chamber	197
172.47	-43.65	wheat	0.211	0.01	100	broadcast	deep placement	urea	New Zealand	dynamic chamber	159
114.067	35.0167	wheat	0.199	0.023	150	broadcast	deep placement	urea	China	micrometeorological method	196
-47.9	-22.0167	ryegrass	0.212	0.106	50	broadcast	incorpration	urea	Brazil	static chamber	198	Pot experiment
108	34.28	maize	0.023	0.0144	100	broadcast	incorpration	urea	China	dynamic chamber	87
108	34.28	maize	0.0352	0.0368	200	broadcast	incorpration	urea	China	dynamic chamber	87
108	34.28	wheat	0.0108	0.0029	100	broadcast	incorpration	urea	China	dynamic chamber	87
108	34.28	wheat	0.0203	0.0022	200	broadcast	incorpration	urea	China	dynamic chamber	87
-71.0333	46.0833	maize	0.64	0.31	140	broadcast	incorpration	urea	Canada	dynamic chamber	199
121.523	31.2293	cabbage	0.1741	0.1112	225	broadcast	incorpration	urea	China	micrometeorological method	200

## Sheet: Citing references
Number	Reference
1	Lin, D. X.; Fan, X. H.; Hu, F.; Zhao, H. T.; Luo, J. F. Ammonia volatilization and nitrogen utilization efficiency in response to urea application in rice fields of the Taihu Lake region, China. Pedosphere 2007, 17 (5), 639-645.
2	Li, H.; Liang, X. Q.; Chen, Y. X.; Tian, G. M.; Zhang, Z. J. Ammonia volatilization from urea in rice fields with zero-drainage water management. Agric. Water Manage. 2008, 95 (8), 887-894.
3	Shang, Q. Y.; Gao, C. M.; Yang, X. X.; Wu, P. P.; Ling, N.; Shen, Q. R.; Guo, S. W. Ammonia volatilization in Chinese double rice-cropping systems: a 3-year field measurement in long-term fertilizer experiments. Biol. Fertil. Soils 2014, 50 (5), 715-725.
4	Fan, X. H.; Song, Y. S.; Lin, D. X.; Yang, L. Z.; Luo, J. F. Ammonia volatilization losses and N15 balance from urea applied to rice on a paddy soil. J. Environ. Sci. 2006, 18 (2), 299-303.
5	Cao, Y. S.; Tian, Y. H.; Yin, B.; Zhu, Z. L. Assessment of ammonia volatilization from paddy fields under crop management practices aimed to increase grain yield and N efficiency. Field Crop. Res. 2013, 147, 23-31.
6	Yu, Q. G.; Ye, J.; Yang, S. N.; Fu, J. R.; Ma, J. W.; Sun, W. C.; Jiang, L. N.; Wang, Q. Effects of nitrogen application level on rice nutrient uptake and ammonia volatilization. Rice Science 2013, 20 (2), 139-147.
7	Zhang, J. S.; Zhang, F. P.; Yang, J. H.; Wang, J. P.; Cai, M. L.; Li, C. F.; Cao, C. G. Emissions of N2O and NH3, and nitrogen leaching from direct seeded rice under different tillage practices in Central China. Agric. Ecosyst. Environ. 2011, 140 (1-2), 164-173.
8	Tian, G. M.; Cai, Z. C.; Cao, J. L.; Li, X. P. Factors affecting ammonia volatilisation from a rice-wheat rotation system. Chemosphere 2001, 42 (2), 123-129.
9	Peng, S. Z.; Yang, S. H.; Xu, J. Z.; Gao, H. Z. Field experiments on greenhouse gas emissions and nitrogen and phosphorus losses from rice paddy with efficient irrigation and drainage management. Sci. China-Technol. Sci. 2011, 54 (6), 1581-1587.
10	Gong, W. W.; Zhang, Y. S.; Huang, X. F.; Luan, S. J. High-resolution measurement of ammonia emissions from fertilization of vegetable and rice crops in the Pearl River Delta Region, China. Atmos. Environ. 2013, 65, 1-10.
11	Iqbal, M. T.; Tian, G.; Liang, X.; Rukshana, F. Measurement of ammonia emission following surface application of urea fertilizer from irrigated paddy rice fields. Agricultural Sciences in China 2005, 4 (4), 288-293.
12	Li, H.; Chen, Y. X.; Liang, X. Q.; Lian, Y. F.; Li, W. H. Mineral-nitrogen leaching and ammonia volatilization from a rice-rapeseed system as affected by 3,4-Dimethylpyrazole phosphate. J. Environ. Qual. 2009, 38 (5), 2131-2137.
13	Zhao, X.; Zhou, Y.; Wang, S. Q.; Xing, G. X.; Shi, W. M.; Xu, R. K.; Zhu, Z. L. Nitrogen balance in a highly fertilized rice-wheat double-cropping system in Southern China. Soil Sci. Soc. Am. J. 2012, 76 (3), 1068-1078.
14	Wang, X. Z.; Zhu, J. G.; Gao, R.; Yasukazu, H.; Feng, K. Nitrogen cycling and losses under rice-wheat rotations with coated urea and urea in the Taihu Lake region. Pedosphere 2007, 17 (1), 62-69.
15	Chen, D. J.; Jiang, L. N.; Huang, H.; Toyota, K.; Dahlgren, R. A.; Lu, J. Nitrogen dynamics of anaerobically digested slurry used to fertilize paddy fields. Biol. Fertil. Soils 2013, 49 (6), 647-659.
16	Zhao, X.; Xie, Y. X.; Xiong, Z. Q.; Yan, X. Y.; Xing, G. X.; Zhu, Z. L. Nitrogen fate and environmental consequence in paddy soil under rice-wheat rotation in the Taihu lake region, China. Plant Soil 2009, 319 (1-2), 225-234.
17	Li, C. F.; Cao, C. G.; Wang, J. P.; Ming, Z.; Yuan, W. L.; Ahmad, S. Nitrogen losses from integrated rice-duck and rice-fish ecosystems in Southern China. Plant Soil 2008, 307 (1-2), 207-217.
18	Cao, C. G.; Li, C. F.; Kou, Z. K.; Yang, J. H.; Wang, J. P. Effects of N source and tillage on NH3 volatilization from paddy soils. Acta Agriculturae Universitatis Jiangxiensis 2010, 32 (5), 881-886.
19	Deng, M. H.; Yin, B.; Zhang, S. L.; Zhu, Z. L.; Shi, X. J. Effects of rate and method of N application on ammonia volatilization in paddy fields. Soils 2006, 38 (3), 263-269.
20	Wang, C.; Zhou, W.; Li, Z.; Liu, X.; Sun, G.; Xia, W.; Wang, X.; Liu, G. Effects of different nitrogen application rates on ammonia volatilization from paddy fields under the double cropping rice system. Plant Nutrition and Fertilizer Science 2012, 18 (2), 349-358.
21	Wu, P. P.; Liu, J. J.; Yang, X. X.; Shang, Q. Y.; Zhou, Y.; Xie, X. L.; Shen, Q. R.; Guo, S. W. Effects of different fertilization systems on ammonia volatilization from double-rice cropping field in red soil region. Chinese Journal of Rice Science 2009, 23 (1), 85-93.
22	Yang, S. H.; Peng, S. Z.; Xu, J. Z.; Yao, J. Q.; Jin, X. P.; Song, J. Characteristics and simulation of ammonia volatilization from paddy fields under different water and nitrogen management. Transactions of the Chinese Society of Agricultural Engineering 2012, 28 (11), 99-104.
23	Xiao, Y.; Xie, G.; Lu, C. Economic values of nitrogen transformation in rice field ecosystems. The Journal of Applied Ecology 2005, 16 (9), 1745-1750.
24	Qin, D. Z.; li, D. C.; Xu, M. G.; Shen, H. P.; Huang, P. N.; Hungwe, P. The relationship of the application of controlled-release fertilizer and the into red ice paddy. Chinese Agricultural Science Bulletin 2008, 24 (9), 273-276.
25	Li, J. M.; Li, D. C.; Xu, M. G.; Shen, H. P.; Qin, D. Z. Ammonia volatilization and its influence factors under different fertilization in red paddy soil with double rice cropping system. Ecology and Environment 2008, 17 (4), 1610-1613.
26	Zhang, H.; Yang, Z.; Luo, L.; Zhang, Q.; Yi, J.; Wang, Y.; Chen, Y.; Wang, M. Study on the ammonia volatilization from paddy field in irrigation area of the Yellow River. Plant Nutrition and Fertilizer Science 2011, 17 (5), 1131-1139.
27	Chen, Z. H.; Chen, L. J.; Wu, Z. J.; Zhang, Y. L.; Juan, Y. H. Ammonia volatilization from rice field under different water conditions in lower Liaohe River Plain. The Journal of Applied Ecology 2007, 18 (12), 2771-2776.
28	Wang, J.; Wang, D.; Zhang, G.; Wang, Y. Comparing the ammonia volatilization characteristic of two typical paddy soil with total wheat straw returning in Taihu Lake region. Chinese Journal of Environmental Science 2013, 34 (1), 27-33.
29	Zhang, W. X.; Sun, G.; He, P.; Liang, G. Q.; Wang, X. B.; Liu, G. R.; Zhou, W. Effects of urease and nitrification inhibitors on ammonia volatilization from paddy fields. Journal of Plant Nutrition and Fertitizer 2013, 19 (6), 1411-1419.
30	Zhu, X. H.; Ma, Z. W.; Ma, Y. H.; Zhang, L. J.; Wang, L. T.; Xu, H. J.; Xiao, S. H. Effect of fertilization on ammonia volatilization from paddy fields in Chao Lake Basin. Acta Ecologica Sinica 2012, 32 (7), 2119-2126.
31	Zhao, L. M.; Wu, L. H.; Wu, M. Y. Effects of SRI on rice yield, water productivity and NH3 volatilization from soil with different N application rates. Journal of Soil Science 2009, 40 (3), 576-579.
32	Hu, A. Y.; Sun, X.; Liu, Q.; Zhang, Y. N.; Wang, S. W.; Wang, D. J.; Cao, Z. H. Influence of different rotations on ammonia volatilization and rice yields of paddy fields in Taihu Lake region. Journal of Soil and Water Conservation 2013, 27 (6), 275-279.
33	Tian, Y. H.; He, F. Y.; Yin, B.; Zhu, Z. L. Ammonia volatilization from paddy fields in the Taihu Lake region as affected by N and P combination in fertilization. Acta Pedologica Sinica 2007, 44 (5), 893-900.
34	Su, C. G.; Yin, B.; Yang, L. Z.; Zhu, Z. L.; Shen, Q. R. In Ammonia volatilization loss and mitigation measures from nitrogen fertilization of paddy rice in Taihu Lake region, The 9th Chinese Young Soil Scientists Symposium and the 4th Chinese Young Plant Nutrition and Fertilizer Scientists Symposium, Jiangsu, China, 2004; Jiangsu, China, 2004.
35	Song, Y. S.; Fan, X. H.; Lin, D. X.; Yang, L. Z.; Zhou, J. M. Ammonia volatilization from paddy fields in the Taihu Lake region and its influencing factors. Acta Pedologica Sinica 2004, 41 (2), 265-269.
36	Yu, Y. L.; Xue, L. H.; Yang, L. Z. Ammonia volatilization from paddy fields under different nitrogen schemes in Tai Lake region. Journal of Agro-Environment Science 2013, 32 (8), 1682-1689.
37	Huang, J. B.; Fan, X. H.; Zhang, S. L. Ammonia volatilization from nitrogen fertilizer in the rice field of Fe-leachi-Stagnic anthrosols in the Taihu Lake region. Acta Pedologica Sinica 2006, 43 (5), 786-792.
38	Zhang, J.; Wang, D. J. Ammonia volatilization in gleyed paddy field soils of Taihu Lake region. Chinese Journal of Eco-Agriculture 2007, 15 (6), 84-87.
39	Xue, L. H.; Yu, Y. L.; Yang, L. Z. Nitrogen balance and environmental impact of paddy field under different N management methods in Taihu Lake region. Chinese Journal of Environmental Science 2011, 32 (4), 1133-1138.
40	Xia, W. J.; Zhou, W.; Liang, G. Q.; Wang, X. B.; Sun, J. W.; Li, S. L.; Hu, C. Effect of optimized nitrogen application on ammonia volatilization from paddy field under wheat-rice rotation system. Plant Nutrition and Fertilizer Science 2010, 16 (1), 6-13.
41	Li, J. M.; Xu, M. G.; Qin, D. Z.; Li, D. C.; Baohe, C.; Bamu, Y. Effects of chemical fertilizers application combined with manure on ammonia volatilization and rice yield in red paddy soil. Plant nutrition and fertitizer science 2005, 11 (1), 51-56.
42	Li, H. L.; Han, Y.; Cai, Z. C. Modeling the ammonia volatilization from common urea and controlled releasing urea fertilizers in paddy soil of Taihui region of China by Jayaweera-Mikkelsen model. Chinese Journal of Environmental Science 2008, 29 (4), 1045-1052.
43	Qi, X. L.; Wu, W.; Shah, F.; Peng, S. B.; Huang, J. L.; Cui, K. H.; Liu, H. Y.; Nie, L. X. Ammonia volatilization from urea-application influenced germination and early seedling growth of dry direct-seeded rice. Sci. World J. 2012, 7.
44	Chen, A. Q.; Lei, B. K.; Hu, W. L.; Lu, Y.; Mao, Y. T.; Duan, Z. Y.; Shi, Z. S. Characteristics of ammonia volatilization on rice grown under different nitrogen application rates and its quantitative predictions in Erhai Lake Watershed, China. Nutr. Cycl. Agroecosyst. 2015, 101 (1), 139-152.
45	Wang, J.; Wang, D. J.; Zhang, G.; Wang, C. Effect of wheat straw application on ammonia volatilization from urea applied to a paddy field. Nutr. Cycl. Agroecosyst. 2012, 94 (1), 73-84.
46	Lin, Z. C.; Dai, Q. G.; Ye, S. C.; Wu, F. G.; Jia, Y. S.; Chen, J. D.; Xu, L. S.; Zhang, H. C.; Huo, Z. Y.; Xu, K.; Wei, H. Y. Effects of nitrogen application levels on ammonia volatilization and nitrogen utilization during rice growing season. Rice Science 2012, 19 (2), 125-134.
47	Xu, M. G.; Li, D. C.; Li, J. M.; Qin, D. Z.; Hosen, Y.; Shen, H. P.; Cong, R. H.; He, X. H. Polyolefin-coated urea decreases ammonia volatilization in a double rice system of Southern China. Agron. J. 2013, 105 (1), 277-284.
48	Sun, H. J.; Zhang, H. L.; Powlson, D.; Min, J.; Shi, W. M. Rice production, nitrous oxide emission and ammonia volatilization as impacted by the nitrification inhibitor 2-chloro-6-(trichloromethyl)-pyridine. Field Crop. Res. 2015, 173, 1-7.
49	Zhao, L. M.; Wu, L. H.; Dong, C. J.; Li, Y. S. Rice yield, nitrogen utilization and ammonia volatilization as influenced by modified rice cultivation at varying nitrogen rates. Agricultural Sciences 2010, 1 (1), 10-16.
50	Datta, A.; Sharma, S. K.; Harit, R. C.; Kumar, V.; Mandal, T. K.; Pathak, H. Ammonia emission from subtropical crop land area in India. Asia-Pac. J. Atmos. Sci. 2012, 48 (3), 275-281.
51	Hou, H.; Zhou, S.; Hosomi, M.; Toyota, K.; Yosimura, K.; Mutou, Y.; Nisimura, T.; Takayanagi, M.; Motobayashi, T. Ammonia emissions from anaerobically-digested slurry and chemical fertilizer applied to flooded forage rice. Water Air Soil Pollut. 2007, 183 (1-4), 37-48.
52	Watanabe, T.; Son, T. T.; Hung, N. N.; Van Truong, N.; Giau, T. Q.; Hayashi, K.; Ito, O. Measurement of ammonia volatilization from flooded paddy fields in Vietnam. Soil Sci. Plant Nutr. 2009, 55 (6), 793-799.
53	Dong, N. M.; Brandt, K. K.; Sorensen, J.; Hung, N. N.; Hach, C. V.; Tan, P. S.; Dalsgaard, T. Effects of alternating wetting and drying versus continuous flooding on fertilizer nitrogen fate in rice fields in the Mekong Delta, Vietnam. Soil Biol. Biochem. 2012, 47, 166-174.
54	Hayashi, K.; Nishimura, S.; Yagi, K. Ammonia volatilization from the surface of a Japanese paddy field during rice cultivation. Soil Sci. Plant Nutr. 2006, 52 (4), 545-555.
55	Phongpan, S.; Freney, J. R.; Keerthisinghe, D. G.; Chaiwanakupt, P. Use of phenylphosphorodiamidate and n-(n-butyl) thiophosphorictriamide to reduce ammonia loss and increase grain-yield following application of urea to flooded rice. Fertil. Res. 1995, 41 (1), 59-66.
56	Chaiwanakupt, P.; Freney, J. R.; Keerthisinghe, D. G.; Phongpan, S.; Blakeley, R. L. Use of urease, algal inhibitors, and nitrification inhibitors to reduce nitrogen loss and increase the grain yield of flooded rice (Oryza sativa L). Biol. Fertil. Soils 1996, 22 (1-2), 89-95.
57	Rao, D. L. N. Slow-release urea fertilizers effect on floodwater chemistry, ammonia volatilization and rice growth in an alkali soil. Fertil. Res. 1987, 13 (3), 209-221.
58	Patel, S. K.; Panda, D.; Mohanty, S. K. Relative ammonia loss from urea-based fertilizers applied to rice under different hydrological situations. Fertil. Res. 1989, 19 (2), 113-119.
59	Panda, M. M.; Mosier, A. R.; Mohanty, S. K.; Chakravorti, S. P.; Chalam, A. B.; Reddy, M. D. Nitrogen-utilization by lowland rice as affected by fertilization with urea and green manure. Fertil. Res. 1995, 40 (3), 215-223.
60	Banerjee, B.; Pathak, H.; Aggarwal, P. K. Effects of dicyandiamide, farmyard manure and irrigation on crop yields and ammonia volatilization from an alluvial soil under a rice (Oryza sativa L.)-wheat (Triticum aestivum L.) cropping system. Biol. Fertil. Soils 2002, 36 (3), 207-214.
61	Freney, J. R.; Trevitt, A. C. F.; Datta, S. K.; De Obcemea, W. N.; Real, J. G. The interdependence of ammonia volatilization and denitrification as nitrogen loss processes in flooded rice fields in the Philippines. Biol. Fertil. Soils 1990, 9 (1), 31-36.
62	Datta, S. K. D.; Trevitt, A. C. F.; Freney, J. R.; Obcemea, W. N.; Real, J. G.; Simpson, J. R. Measuring nitrogen losses from lowland rice using bulk aerodynamic and Nitrogen-15 balance methods. Soil Sci. Soc. Am. J. 1989, 53 (4), 1275-1281.
63	Datta, S. K. D.; Buresh, R. J.; Samson, M. I.; Obcemea, W. N.; Real, J. G. Direct measurement of ammonia and denitrification fluxes from urea applied to rice. Soil Sci. Soc. Am. J. 1991, 55 (2), 543-548.
64	Fillery, I. R. P.; Simpson, J. R.; Datta, S. K. d. Influence of field environment and fertilizer management on ammonia loss from flooded rice. Soil Sci. Soc. Am. J. 1984, 48 (4), 914-920.
65	Simpson, J. R.; Freney, J. R.; Muirhead, W. A.; Leuning, R. Effects of phenylphosphorodiamidate and dicyandiamide on nitrogen loss from flooded rice. Soil Sci. Soc. Am. J. 1985, 49 (6), 1426-1431.
66	Simpson, J. R.; Freney, J. R.; Wetselaar, R.; Muirhead, W. A.; Leuning, R.; Denmead, O. T. Transformations and losses of urea nitrogen after application to flooded rice. Australian Journal of Agricultural Research 1984, 35 (2), 189-200.
67	Freney, J. R.; Denmead, O. T.; Watanabe, I.; Craswell, E. T. Ammonia and nitrous oxide losses following applications of ammonium sulfate to flooded rice. Australian Journal of Agricultural Research 1981, 32 (1), 37-45.
68	Chauhan, H. S.; Mishra, B. Ammonia volatilization from a flooded rice field fertilized with amended urea materials. Fertil. Res. 1989, 19 (1), 57-63.
69	Freney, J. R.; Trevitt, A. C. F.; Muirhead, W. A.; Denmead, O. T.; Simpson, J. R.; Obcemea, W. N. Effect of water depth on ammonia loss from lowland rice. Fertil. Res. 1988, 16 (2), 97-107.
70	Humphreys, E.; Freney, J. R.; Muirhead, W. A.; Denmead, O. T.; Simpson, J. R.; Leuning, R.; Trevitt, A. C. F.; Obcemea, W. N.; Wetselaar, R.; Cai, G. X. Loss of ammonia after application of urea at different times to dry-seeded, irrigated rice. Fertil. Res. 1988, 16 (1), 47-57.
71	Simpson, J. R.; Muirhead, W. A.; Bowmer, K. H.; Cai, G. X.; Freney, J. R. Control of gaseous nitrogen losses from urea applied to flooded rice soils. Fertil. Res. 1988, 18 (1), 31-47.
72	Fillery, I. R. P.; Datta, S. K. d. Ammonia volatilization from nitrogen sources applied to rice fields: I. Methodology ammonia fluxes, and nitrogen-15 loss. Soil Sci. Soc. Am. J. 1986, 50 (1), 80-86.
73	Panda, D.; Mahata, K. R.; Sen, H. S.; Patnaik, S. Transformation and loss of nitrogen due to leaching and ammonia volatilization in wetland rice (Oryza sativa) soil. Indian Journal of Agricultural Sciences 1989, 59 (2), 91-96.
74	Obcemea, W. N.; Real, J. G.; Datta, S. K. d. Effect of soil texture and nitrogen management on ammonia volatilization and total nitrogen losses. Philippine Journal of Crop Science 1988, 13 (3), 145-153.
75	Mikkelsen, D. S.; Datta, S. K. d.; Obcemea, W. N. Ammonia volatilization losses from flooded rice soils. Soil Sci. Soc. Am. J. 1978, 42 (5), 725-730.
76	Santra, G. H.; Das, D. K.; Mandal, L. N. Loss of nitrogen through ammonia volatilization from flooded river fields. Journal of the Indian Society of Soil Science 1988, 36 (4), 652-659.
77	Kumar, K. A.; Menon, P. K. G. Seasonal variations in ammonia volatilisation as influenced by nitrogen sources in water logged laterite rice. Fertiliser News 1992, 37, 65-67.
78	Bowmer, K. H.; Muirhead, W. A. Inhibition of algal photosynthesis to control pH and reduce ammonia volatilization from rice floodwater. Fertil. Res. 1987, 13 (1), 13-29.
79	Bacon, P. E.; Hoult, E. H.; Lewin, L. G.; McGarity, J. W. Ammonia volatilization from drill sown rice bays. Fertil. Res. 1988, 16 (3), 257-272.
80	Saravanan, A.; Velu, V.; Ramanathan, K. M. Ammonia volatilization loss in rice soils of Cauvery Delta. International Rice Research Notes 1987, 12, 59-60.
81	Sahrawat, K. L. Ammonia volatilization losses in some tropical flooded rice soils under field conditions. Riso (Italy) 1980, 29, 21-27.
82	Sen, H. S.; Bandyopadhyay, B. K. Effect of placement, urease inhibitors and acidic amendments on ammonia volatilization from wetland rice field fertilized with urea. Journal of the Indian Society of Soil Science 1986, 34 (3), 514-519.
83	Zhang, Y. M.; Chen, D. L.; Zhang, J. B.; Edis, R.; Hu, C. S.; Zhu, A. N. Ammonia volatilization and denitrification losses from an irrigated maize-wheat rotation field in the North China Plain. Pedosphere 2004, 14 (4), 533-540.
84	Fan, X. H.; Song, Y. S.; Lin, D. X.; Yang, L. Z.; Zhou, J. M. Ammonia volatilization losses from urea applied to wheat on a paddy soil in Taihu Region, China. Pedosphere 2005, 15 (1), 59-65.
85	Zhao, B.; Dong, S. T.; Zhang, J. W.; Liu, P. Effects of controlled-release fertiliser on nitrogen use efficiency in summer maize. PLoS One 2013, 8 (8), 8.
86	Li, D. J. Emissions of NO and NH3 from a Typical Vegetable-Land Soil after the Application of Chemical N Fertilizers in the Pearl River Delta. PLoS One 2013, 8 (3), 8.
87	Roelcke, M.; Li, S. X.; Tian, X. H.; Gao, Y. J.; Richter, J. In situ comparisons of ammonia volatilization from N fertilizers in Chinese loess soils. Nutr. Cycl. Agroecosyst. 2002, 62 (1), 73-88.
88	Su, W.; Lu, J. W.; Wang, W. N.; Li, X. K.; Ren, T.; Cong, R. H. Influence of rice straw mulching on seed yield and nitrogen use efficiency of winter oilseed rape (Brassica napus L.) in intensive rice-oilseed rape cropping system. Field Crop. Res. 2014, 159, 53-61.
89	Liu, X. J.; Ju, X. T.; Zhang, F. S.; Pan, J. R.; Christie, P. Nitrogen dynamics and budgets in a winter wheat-maize cropping system in the North China Plain. Field Crop. Res. 2003, 83 (2), 111-124.
90	Dong, W. X.; Hu, C. S.; Chen, S. Y.; Qin, S. P.; Zhang, Y. M. Effect of conservation tillage on ammonia volatilization from nitrogen fertilizer in winter wheat-summer maize cropping system. Scientia Agricultura Sinica 2013, 46 (11), 2278-2284.
91	Lu, Y. Y.; Song, F. P. Effects of different coated controlled-release urea on soil ammonia volatilization in farmland. Acta Ecologica Sinica 2011, 31 (23), 7133-7140.
92	Wu, J. Effects of different nitrogen fertilizer varieties on ammonia volatilization and winter wheat yield in farmland. Chinese Academy of Agricultural Sciences, Beijing China, 2009.
93	Ji, Y. Z.; Ju, X. T.; Liu, X. Y.; Zhang, L. J.; Li, X.; Liu, N. Ampact of different nitrogen application on nitrogen movement and gaseous loss of winter wheat fields. Journal of Soil and Water Conservation 2010, 24 (3), 113-118.
94	Yang, S. L.; Zhu, A. N.; Zhang, J. B.; Chen, X. M.; Zhu, Q. G. Ammonia volatilization loss and its affecting factors under different amounts and ways of N application in field. Arid Zone Research 2010, 27 (3), 415-421.
95	Zhang, C.; Wu, X.; Wu, H.; Cai, D. Research on the relationship of ammonia volatilization rate and fertilizer type with irrigation treatments for winter wheat in North China. Soil and Fertilizer Sciences in China 2008, (5), 28-32.
96	Gong, W. W.; Zhang, Y. S.; He, L. Y.; Luan, S. J. In-situ measurement on volatilization loss of ammonia in the vegetable field and its influencing factors. Chinese Journal of Environmental Science 2011, 32 (2), 345-350.
97	Zhou, J.; Cui, J.; Wang, G.; He, Y.; Ma, Y. Ammonia volatilization in relation to N application rate and climate factors in upland red soil in spring and autumn. Acta Pedologica Sinica 2007, 44 (3), 499-507.
98	Su, F.; Ding, X. Q.; Gao, Z. L.; Huang, B. X.; Chen, X. P.; Zhang, F. S.; Kogge, M.; Romheld, V. Ammonia volatilization from nitrogen fertilization of winter wheat-summer maize rotation system in the North China Plain. China Environmental Science 2007, 27 (3), 409-413.
99	Li, X. Fate of fertilizer nitrogen and gaseous N loss in winter wheat-summer maize rotation system in North China Plain. Agricultural University of Hebei, Hebei, 2007.
100	Wang, J.; Ju, X. T.; Zhang, L. J.; Zhang, J. T.; Yuan, L. J. Ammonia volatilization of N fertilizer and influencing factors in the North China Plain. Journal of Agricultural University of Hebei 2009, 32 (3), 5-11.
101	Dong, W. X.; Wu, D. M.; Hu, C. S.; Zhang, Y. M.; Yang, P. P.; Wang, Y. Ammonia volatilization and control mechanisms in the piedmont of North China Plain. Chinese Journal of Eco-Agriculture 2011, 19 (5), 1115-1121.
102	Zhang, Y. M.; Hu, C. S.; Dong, W. X. Ammonia volatilization from wheat-maize rotation field in the piedmont of Taihang. Plant nutrition and fertitizer science 2005, 11 (3), 417-419.
103	Lei, Y. L.; Wang, L. Q.; Xue, L. A.; Li, Z. J.; Shang, H. B. Effect of alternative irrigation and fertilization on soil ammonia volatilization of summer maize. Transactions of the Chinese Society of Agricultural Engineering 2009, 25 (4), 41-46.
104	Han, K.; Zhang, J. T.; Shangguan, Y. X.; Shi, R. P.; Li, Z. J.; Wang, L. Q. Effects of water and nitrogen coupling on soil gaseous nitrogen emission under alternate irrigation and N placement. Chinese Journal of Environmental Science 2011, 32 (6), 1557-1563.
105	Zhao, B.; Dong, S. T.; Wang, K. J.; Zhang, J. W.; Peng, L. Effects of controlled-release fertilizers on summer maize grain yield,field ammonia volatilization,and fertilizer nitrogen use efficiency. The Journal of Applied Ecology 2009, 20 (11), 2678-2684.
106	Liu, R. Effect of controlled release urea on soil ammonia volatilization, nitrogen content, microbial diversity and wheat yield. Shandong Agricultural University, 2010.
107	Shangguan, Y. X.; Shi, R. P.; Han, K.; Wang, L. Q. The dynamics of ammonia volatilization in winter wheat field with furrow planting system and ridge with plastic film mulching. Agricultural Research in the Arid Areas 2011, 29 (5), 163-168.
108	Shangguan, Y. X.; Shi, R. P.; Li, N.; Han, K.; Li, H. K.; Wang, L. Q. Factors influencing ammonia volatilization in a winter wheat field with plastic film mulched ridges and unmulched furrows. Chinese Journal of Environmental Science 2012, 33 (6), 1987-1993.
109	He, Y. F.; Yin, B.; Jin, X. X.; Cao, B.; Cai, G. X. Ammonia volatilization from urea applied to two vegetable fields in Nanjing suburbs. Acta Pedologica Sinica 2005, 42 (2), 253-259.
110	Ma, Y. L.; Ji, Y. Z.; Li, X.; Zhang, L.; Ju, X. T.; Zhang, L. J. Effects of N fertilization rates on the NH3 volatilization and N2O emissions from the wheat-maize rotation system in North China Plain. Ecology and Environmental Sciences 2012, 21 (2), 225-230.
111	Liu, L. Y.; Cao, Y. S.; Tian, Y. H.; Yin, B.; Zhu, Z. L. Ammonia volatilization and nitric oxide emission from soil during winter wheat season in Taihu Lake region. Journal of Plant Nutrition and Fertitizer 2013, 19 (6), 1420-1427.
112	Xu, W. L.; Liu, H.; Zhang, Y. S.; Wang, X. H.; Qin, Q.; Liao, Z. W. In Situ monitoring of ammonia volatilization from grey desert soil under different in Xinjiang. Acta Ecologica Sinica 2009, 29 (8), 4565-4571.
113	Chen, X. N.; Xue, J. H.; Wu, Y. B. Characteristics of soil ammonia volatilization in interplanting system of poplar and wheat. Journal of Nanjing Forestry University 2013, 37 (1), 127-131.
114	Bin, W. X.; Wei, Z.; Qing, L. G.; Pei, X. X.; Xia, W. J.; Sun, J. W. Effect of optimized nitrogen application on ammonia volatilization from soil in winter wheat-summer corn rotation system in Northern China. Plant Nutrition and Fertitizer Science 2009, 15 (2), 344-351.
115	Ni, K.; Ding, W.; Cai, Z. Ammonia volatilization from soil as affected by long-term application of organic manure and chemical fertilizers during wheat growing season. Journal of Agro-Environment Science 2009, 28 (12), 2614-2622.
116	Nie, S. W.; Chen, Y. Q.; Sui, P.; Gao, W. S.; Huang, J. X.; Li, Y. Y.; Xiong, J.; Shi, X. P.; Wu, X. M.; Sun, Z. G. Ammonia volatilization in intercropping field of maize with different crops. Scientia Agricultura Sinica 2011, 44 (3), 634-640.
117	Wu, H. S.; Guo, D. J.; Ma, Y.; Chang, Z. Z. Effects of pig manure-biogas slurry application on soil ammonia volatilization and maize output and quality. Chinese Journal of Eco-Agriculture 2012, 20 (2), 163-168.
118	Mariano, E.; Trivelin, P. C. O.; Vieira, M. X.; Leite, J. M.; Otto, R.; Franco, H. C. J. Ammonia losses estimated by an open collector from urea applied to sugarcane straw. Rev. Bras. Cienc. Solo 2012, 36 (2), 411-419.
119	Zavaschi, E.; Faria, L. D.; Vitti, G. C.; Nascimento, C. A. D.; de Moura, T. A.; do Vale, D. W.; Mendes, F. L.; Kamogawa, M. Y. Ammonia volatilization and yield components after application of polymer-coated urea to maize. Rev. Bras. Cienc. Solo 2014, 38 (4), 1200-1206.
120	Wang, Z. H.; Liu, X. J.; Ju, X. T.; Zhang, F. S.; Malhi, S. S. Ammonia volatilization loss from surface-broadcast urea: Comparison of vented- and closed-chamber methods and loss in winter wheat-summer maize rotation in North China Plain. Commun. Soil Sci. Plant Anal. 2004, 35 (19-20), 2917-2939.
121	Huang, P.; Zhang, J. B.; Zhu, A. N.; Xin, X. L.; Zhang, C. Z.; Ma, D. H.; Yang, S.; Mirza, Z.; Wu, S. J. Coupled water and nitrogen (N) management as a key strategy for the mitigation of gaseous N losses in the Huang-Huai-Hai Plain. Biol. Fertil. Soils 2015, 51 (3), 333-342.
122	Li, Q. Q.; Yang, A. L.; Wang, Z. H.; Roelcke, M.; Chen, X. P.; Zhang, F. S.; Pasda, G.; Zerulla, W.; Wissemeier, A. H.; Liu, X. J. Effect of a new urease inhibitor on ammonia volatilization and nitrogen utilization in wheat in North and Northwest China. Field Crop. Res. 2015, 175, 96-105.
123	Martines, A. M.; Nogueira, M. A.; Santos, C. A.; Nakatani, A. S.; Andrade, C. A.; Coscione, A. R.; Cantarella, H.; Sousa, J. P.; Cardoso, E. Ammonia volatilization in soil treated with tannery sludge. Bioresour. Technol. 2010, 101 (12), 4690-4696.
124	Turner, D. A.; Edis, R. B.; Chen, D.; Freney, J. R.; Christie, R. Determination and mitigation of ammonia loss from urea applied to winter wheat with N-(n-butyl) thiophosphorictriamide. Agric. Ecosyst. Environ. 2010, 137 (3), 261-266.
125	Turner, D. A.; Edis, R. E.; Chen, D.; Freney, J. R.; Denmead, O. T. Ammonia volatilization from nitrogen fertilizers applied to cereals in two cropping areas of southern Australia. Nutr. Cycl. Agroecosyst. 2012, 93 (2), 113-126.
126	Paredes, D. D.; Lessa, A. C. D.; de Sant'Anna, S. A. C.; Boddey, R. M.; Urquiaga, S.; Alves, B. J. R. Nitrous oxide emission and ammonia volatilization induced by vinasse and N fertilizer application in a sugarcane crop at Rio de Janeiro, Brazil. Nutr. Cycl. Agroecosyst. 2014, 98 (1), 41-55.
127	Predotova, M.; Gebauer, J.; Diogo, R. V. C.; Schlecht, E.; Buerkert, A. Emissions of ammonia, nitrous oxide and carbon dioxide from urban gardens in niamey, Niger. Field Crop. Res. 2010, 115 (1), 1-8.
128	Jambert, C.; Serca, D.; Delmas, R. Quantification of N-losses as NH3, NO, and N2O and N2 from fertilized maize fields in southwestern France. Nutr. Cycl. Agroecosyst. 1997, 48 (1-2), 91-104.
129	Vermoesen, A.; Demeyer, P.; Hofman, G.; Cleemput, O. v. Field measurements of ammonia volatilization upon application of different NH4+ fertilizers and urea. Pedologie 1992, 42 (2), 119-128.
130	McInnes, K. J.; Ferguson, R. B.; Kissel, D. E.; Kanemasu, E. T. Ammonia loss from applications of urea-ammonium nitrate solution to straw residue. Soil Sci. Soc. Am. J. 1986, 50 (3), 964-974.
131	Al-Kanani, T.; MacKenzie, A. F. Effect of tillage practices and hay straw on ammonia volatilization from nitrogen fertilizer solutions. Canadian Journal of Soil Science 1992, 72 (2), 145-157.
132	Bundy, L. G.; Oberle, S. L. Evaluation of methods for control of ammonia volatilization from surface-applied urea-containing fertilizers. Journal of Fertilizer Issues 1988, 5 (1), 24-30.
133	Bronson, K. F.; Touchton, J. T.; Hiltbold, A. E.; Hendrickson, L. L. Control of ammonia volatilization with N- (N-butyl) thiophosphoric triamide in loamy sands. Commun. Soil Sci. Plant Anal. 1989, 20 (13/14), 1439-1451.
134	Freney, J. R.; Simpson, J. R.; Denmead, O. T.; Muirhead, W. A.; Leuning, R. Transformations and transfers of nitrogen after irrigating a cracking clay soil with a urea solution. Australian Journal of Agricultural Research 1985, 36 (5), 684-694.
135	Praveen, K.; Aggarwal, R. K. Reduction of ammonia volatilization from urea by rapid nitrification. Arid Soil Research and Rehabilitation 1988, 2 (2), 131-138.
136	Grant, C. A.; Jia, S.; Brown, K. R.; Bailey, L. D. Volatile losses of NH3 from surface-applied urea and urea ammonium nitrate with and without the urease inhibitors NBPT or ammonium thiosulphate. Canadian Journal of Soil Science 1996, 76 (3), 417-419.
137	Bacon, P. E.; Hoult, E. H.; McGarity, J. W. Ammonia volatilization from fertilizers applied to irrigated wheat soils. Fertil. Res. 1986, 10 (1), 27-42.
138	Freney, J. R.; Denmead, O. T.; Wood, A. W.; Saffigna, P. G.; Chapman, I. S.; Ham, G. J.; Hurney, A. P.; Stewart, R. L. Factors controlling ammonia loss from trash covered sugarcane fields fertilized with urea. Fertil. Res. 1992, 31 (3), 341-349.
139	Ferguson, R. B.; McInnes, K. J.; Kissel, D. E.; Kanemasu, E. T. A comparison of methods of estimating ammonia volatilization in the field. Fertil. Res. 1988, 15 (1), 55-69.
140	Bacon, P. E.; Freney, J. R. Nitrogen loss from different tillage systems and the effect on cereal grain yield. Fertil. Res. 1989, 20 (2), 59-66.
141	Gezgin, S.; Bayrakll, F. Ammonia volatilization from ammonium-sulfate, ammonium-nitrate, and urea surface-applied to winter-wheat on a calcareous soil. J. Plant Nutr. 1995, 18 (11), 2483-2494.
142	Ouyang, D. S.; Mackenzie, A. F.; Fan, M. X. Ammonia volatilization from urea amended with triple superphosphate and potassium chloride. Soil Sci. Soc. Am. J. 1998, 62 (5), 1443-1447.
143	Urban, W. J.; Hargrove, W. L.; Bock, B. R.; Raunikar, R. A. Evaluation of urea-urea phosphate as a nitrogen source for no-tillage production. Soil Sci. Soc. Am. J. 1987, 51 (1), 242-246.
144	Hargrove, W. L.; Bock, B. R.; Raunikar, R. A.; Urban, W. J. Comparison of a forced-draft technique to nitrogen-15 recovery for measuring ammonia volatilization under field conditions. Soil Sci. Soc. Am. J. 1987, 51 (1), 124-128.
145	Beauchamp, E. G.; Kidd, G. E.; Thurtell, G. Ammonia volatilization from liquid dairy cattle manure in the field. Canadian Journal of Soil Science 1982, 62 (1), 11-19.
146	McInnes, K. J.; Ferguson, R. B.; Kissel, D. E.; Kanemasu, E. T. Field measurements of ammonia loss from surface applications of urea solution to bare soil. Agron. J. 1986, 78 (1), 192-196.
147	Hoff, J. D.; Nelson, D. W.; Sutton, A. L. Ammonia volatilization from liquid swine manure applied to cropland. J. Environ. Qual. 1981, 10 (1), 90-95.
148	Sherlock, R. R.; Goh, K. M. Dynamics of ammonia volatilization from simulated urine patches and aqueous urea applied to pasture. I. Field experiments. Fertil. Res. 1984, 5 (2), 181-195.
149	Van, J.; Molen, D.; Faassen, H. G. V.; Leclerc, M. Y.; Chardon, W. J. Ammonia volatilization from arable land after application of cattle slurry. 1. field estimates. Netherlands Journal of Agricultural Science 1990, 38, 145-158.
150	Horlacher, D.; Marschner, H. Schätzrahmen zur beurteilung von ammoniakverlusten nach ausbringung von rinderflssigmist. Journal of Plant Nutrition and Soil Science 2010, 153 (2), 107-115.
151	Fox, R. H.; Hoffman, L. D. Estimating ammonia volatilization losses from urea fertilizers uring a simplified micrometeorological sampler. Agron. J. 1981, 73, 891-895.
152	vander Weerden, T. J.; Jarvis, S. C. Ammonia emission factors for N fertilizers applied to two contrasting grassland soils. Environ. Pollut. 1997, 95 (2), 205-211.
153	Fan, M. X.; MacKenzie, A. F.; Blenkhorn, H. D. A modified urea based NP fertilizer: Urea-TSP-MAP combinations. Fertil. Res. 1995, 45 (3), 217-220.
154	Dhyani, B. P.; Mishra, B. Effect of nitrogen-application schedule on ammonia volatilization from field of rice (Oryza sativa). Indian Journal of Agricultural Sciences 1992, 62 (1), 73-74.
155	Palma, R. M.; Saubidet, M. I.; Rimolo, M.; Utsumi, J. Nitrogen losses by volatilization in a corn crop with two tillage systems in the Argentine Pampa. Commun. Soil Sci. Plant Anal. 1998, 29 (19-20), 2865-2879.
156	Dosch, P.; Gutser, R. Reducing N losses (NH3, N2O, N2) and immobilization from slurry through optimized application techniques. Fertil. Res. 1996, 43 (1-3), 165-171.
157	Aggarwal, R. K.; Raina, P.; Praveen, K. Ammonia volatilization losses from urea and their possible management for increasing nitrogen use efficiency in an arid region. Journal of Arid Environments 1987, 13 (2), 163-168.
158	Sommer, S. G.; Jensen, C. Ammonia volatilization from urea and ammoniacal fertilizers surface applied to winter wheat and grassland. Fertil. Res. 1993, 37 (2), 85-92.
159	Black, A. S.; Sherlock, R. R.; Smith, N. P.; Cameron, K. C. Ammonia volatilisation from urea broadcast in spring on to autumn-sown wheat. New Zealand Journal of Crop and Horticultural Science 1989, 17 (2), 175-182.
160	Keller, G. D.; Mengel, D. B. Ammonia volatilization from nitrogen fertilizers surface applied to no-till corn. Soil Sci. Soc. Am. J. 1986, 50 (4), 1060-1063.
161	Lu, Y. Y.; Song, F. P.; Zhao, J.; Gao, Y. Effects of controlled-release urea on ammonia volatilization and inorganic nitrogen of soil and nitrogen use efficiency in maize. Journal of Soil and Water Conservation 2010, 24 (6), 79-82.
162	Beyrouty, C. A.; Sommers, L. E.; Nelson, D. W. Ammonia volatilization from surface-applied urea as affected by several phosphoroamide compounds. Soil Sci. Soc. Am. J. 1988, 52 (4), 1173-1178.
163	Li, Z. X.; Dong, S. T.; Wang, K. J.; Zhang, J. W.; Liu, P.; Wang, Q. C.; X., L. C. In situ study on influence of different fertilization strategies for summer maize on soil nitrogen leaching and volatilization. Plant Nutrition and Fertilizer Science 2007, 13 (6), 998-1005.
164	Lin, L.; Hu, K. L.; Li, G. D.; Wang, H. Y. Evaluation of Nitrogen loss way in summer maize system under different fertilizer N managements. Environmental Science 2011, 32 (9), 2617-2624.
165	Zhang, X. L.; Wang, Q.; Xu, J.; S., G. F.; Tremblay, N.; Li, C. H. In situ nitrogen mineralization, nitrification, and ammonia volatilization in maize field fertilized with urea in Huanghuaihai region of Northern China. PLoS One 2015, 10 (1), e0115649.
166	Zhao, B.; Dong, S. T.; Wang, K. J.; Zhang, J. W.; liu, P. Effects of controlled-release fertilizers on summer maize grain field ammonia volatilization and fertilizer nitrogen use efficiency. Chinese Journal of Applied Ecology 2009, 20 (11), 2678-2684.
167	Han, K.; Zhou, C. J.; Wang, L. Q. Reducing ammonia volatilization from maize fields with separation of nitrogen fertilizer and water in an alternating furrow irrigation system. Journal of Integrative Agriculture 2014, (5), 1099-1112.
168	Cai, G. X.; Zhu, Z. L.; Zhu, Z. W.; Trevitt, A. C. F.; Freney, J. R.; Simpson, J. R. Nitrogen loss from ammonium bicarbonate and urea fertilizers applied to flooded rice. Soils 1985, 17 (5).
169	Cai, G. X.; Zhu, Z. L.; Zhu, Z. W.; Trevitt, A. C. F.; Freney, J. R.; Simpson, J. R. Nitrogen loss from ammonium bicarbonate and urea fertilizers applied to flooded rice. Fertil. Res. 1986, 10, 203-215.
170	Cai, G. X.; Yang, N. C.; Lu, W. F.; Chen, W.; Xia, B. Q.; Wang, X. Z.; Zhu, Z. L. Gaseous Loss of Nitrogen from Fertilizers Applied to a Paddy Soil in Southeastern China. Pedosphere 1992, 2 (3), 209-217.
171	Zhu, Z. L.; Cai, G. X.; Simpson, J. R.; Zhang, S. L.; Chen, D. L. Processes of nitrogen loss from fertilizers applied to flooded rice fields on a calcareous soil in North-Central China. Fertil. Res. 1988, 18 (2), 101-115.
172	Zhu, J.; Shi, L. H.; Tian, F. X.; Ji, X. H. Ammonia volatilization loss from typical double-cropping paddy field with basal application of ammonium bicarbonate and urea. Soils and Fertilizers Sciences in China 2015, (2), 83-88.
173	Bian, X. J.; Wang, W. J.; Yang, F. C.; Li, R. G.; Cai, G. X.; Li, X. H.; Yang, Z.; Zhu, Z. L. Fate of fertilizer nitrogen applied to spring wheat growing on a meadow chestnut soil in plateau of north Hebei province. Acta Pedologica Sinica 1997, 34 (1), 60-66.
174	Guan, J. X.; Wang, B. R.; Li, D. C. Effect of chemical fertilizer applied combing with organic manure on yield of rice and nitrogen using efficiency. Chinese Agricultural Science Bulletin 2009, 25 (11), 88-92.
175	Norman, R.; Wilson Jr, C.; Slaton, N.; Boothe, D.; Griggs, B.; Bushong, J. Effect of Agrotain, ammonium sulfate, and urea on ammonia volatilization loss and rice grain yield when applied at different times prior to flooding. B.R. Wells Rice Res. Stud., 2003, 279-285.
176	Vlek, P.; Craswell, E. Effect of nitrogen source and management on ammonia volatilization losses from flooded rice-soil systems. Soil Sci. Soc. Am. J. 1979, 43, 352-358.
177	Fontoura, S. M. V.; Bayer, C. Ammonia volatilization in no-till system in the south-central region of the State of Paraná, Brazil. Rev. Bras. Cienc. Solo 2010, 34, 1677-1684.
178	Massey, C.; Slaton, N.; Gordon, B.; Norman, R.; Roberts, T. Winter wheat grain yield and ammonia volatilization response to late-winter applied nitrogen. Soil Fertil. Stud. 2011, 21.
179	Turner, D. A.; Edis, R. E.; Chen, D.; Freney, J. R.; Denmead, O. T. Ammonia volatilization from nitrogen fertilizers applied to cereals in two cropping areas of southern Australia. Nutr. Cycl. Agroecosyst. 2012, 93, 113-126.
180	Li, F. L. The effect of long-term fertilization on wheat yiled and the ecological environment in the dry-land of loess. Northwest Agriculture & Forestry University, 2009.
181	Faria, L. d. A.; Nascimento, C. A. C. d.; Vitti, G. C.; Luz, P. H. d. C.; Guedes, E. M. S. Loss of ammonia from nitrogen fertilizers applied to maize and soybean straw. Rev. Bras. Cienc. Solo 2013, 37, 969-975.
182	Bernardi, A. C. C.; Mota, E. P.; Cardosa, R. D.; Monte, M. B. M.; Oliveira, P. P. A. Ammonia volatilization from soil, dry-matter yield, and nitrogen levels of Italian ryegrass. Commun. Soil Sci. Plant Anal. 2013, 45, 153-162.
183	Black, A.; Sherlock, R.; Smith, N.; Cameron, K.; Goh, K. Effect of previous urine application on ammonia volatilisation from 3 nitrogen fertilisers. N. Z. J. Agric. Res. 1984, 27, 413-416.
184	Black, A.; Sherlock, R.; Smith, N.; Cameron, K.; Goh, K. Effects of form of nitrogen, season, and urea application rate on ammonia volatilisation from pastures. N. Z. J. Agric. Res. 1985, 28, 469-474.
185	Cornforth, I.; Chesney, H. Nitrification inhibitors and ammonia volatilization. Plant Soil 1971, 34, 497-501.
186	Du Preez, C.; Burger, R. D. T. Ammonia losses from ammonium-containing and-forming fertilizers after surface application at different rates on alkaline soils. Fertil. Res. 1988, 15, 71-78.
187	Faria, L. d. A.; Nascimento, C. A. C. d.; Ventura, B. P.; Florim, G. P.; Luz, P. H. d. C.; Vitti, G. C. Hygroscopicity and ammonia volatilization losses from nitrogen sources in coated urea. Rev. Bras. Cienc. Solo 2014, 38, 942-948.
188	Martins, M. R.; Jantalia, C. P.; Polidoro, J. C.; Batista, J. N.; Alves, B. J. R.; Boddey, R. M.; Urquiaga, S. Nitrous oxide and ammonia emissions from N fertilization of maize crop under no-till in a Cerrado soil. Soil Till. Res. 2015, 151, 75-81.
189	Matsunaka, T.; Sentoku, A.; Mori, K.; Satoh, S. Ammonia volatilization factors following the surface application of dairy cattle slurry to grassland in Japan: Results from pot and field experiments. Soil Sci Plant Nutr. 2008, 54, 627-637.
190	Oenema, O.; Velthof, G. Ammonia volatilization from compound nitrogen-sulfur fertilizers. Optimization of Plant Nutrition 1993, 341-349.
191	Schwenke, G. D.; Manning, W.; Haigh, B. M. Ammonia volatilisation from nitrogen fertilisers surface-applied to bare fallows, wheat crops and perennial-grass-based pastures on Vertosols. Soil Res. 2014, 52, 805-821.
192	Theobald, P.; Ball, P. R. Nitrogen lost by ammonia volatilisation, and the effectiveness of urea and ammonium sulphate fertilisers. Proceedings of the New Zealand Grassland Association 1984, 236-238.
193	Xu, J. Z.; Liao, L. X.; Tan, J. Y.; Shao, X. H. Ammonia volatilization in gemmiparous and early seedling stages from direct seeding rice fields with different nitrogen management strategies: A pots experiment. Soil & Tillag Research 2013, 126, 169–176.
194	Cai, G. X.; Chen, D. L.; Pacholski, A. Nitrogen losses from fertilizers applied to maize, wheat and rice in the North China Plain. Nutr. Cycl. Agroecosyst. 2002, 63, 187-195.
195	Zhang, S. L.; Cai, G. X.; Wang, X. Z.; Xu, Y. H.; Zhu, Z. L.; Freney, J. R. Losses of urea-nitrogen applied to maize grown on a calcareous fluvo-aquci soil in North China Plain. Pedosphere 1992, 2 (2), 171-178.
196	Pacholski, A.; Cai, G. X.; Nieder, R.; Richter, J.; Fan, X. H.; Zhu, Z. L.; Roelcke, M. Calibration of a simple method for determining ammonia volatilization in the field- comparative measurements in Henan province, China. Nutr. Cycl. Agroecosyst. 2006, 74 (3), 259-273.
197	Qiao, Y. F.; Han, X., Z.; Zhao, L. P.; Wang, S. Q. Rsearches on ammonia volatilization loss characters of nitrogen fertilizer from black soil. Journal of Soil and Water Conservation 2009, 23 (1), 198-200.
198	Alberto, C. C. B.; Edson, P. M.; Rodrigo, D. C.; Marisa, B. M. M.; Oliveira, P. P. A. Ammonia volatilization from soil, dry-matter yield, and nitrogen levels of Italian ryegrass. Commun. Soil Sci. Plant Anal. 2014, 45 (2), 153-162.
199	Rochette, P.; Angers, D. A.; Chantigny, M. H.; Macdonald, J. D.; Gasser, M. O.; Bertrand, N. Reducing ammonia volatilization in a no-till soil by incorporating urea and pig slurry in shallow bands. Nutr. Cycl. Agroecosyst. 2009, 84 (1), 71-80.
200	Xi, Z. B.; Shi, X. Z.; Huang, W. X.; Yao, Z.; Humphreys, E.; Freney, J. R.; Simpson, J. R. Measuring urea loss from ammonia volatilization by a micrometeorological method. Acta Agriculturae Shanghai 1987, 3 (4), 47-56.
201	Zhu, X. M.; Dong, W. Y.; Wang, H. Y.; Yan, C. R.; Liu, H. B.; K., L. E. Effects of cattle manure composting methods on greenhouse gas and ammonia emissions. Transactions of the Chinese Society of Agricultural Engineering 2017, 33 (10), 258-264.
202	Bouwman, A. F.; Lee, D. S.; Asman, W. A. H.; Dentener, F. J.; VanderHoek, K. W.; Olivier, J. G. J. A global high-resolution emission inventory for ammonia. Glob. Biogeochem. Cycle 1997, 11 (4), 561-587.
203	Chen, H. X. Ammonia volatilization characteristics and nitrate nitrogen accumulation of different types of soils. Jilin agticultural university, 2015.
204	Pan, B. B.; Lam, S. K.; Mosier, A.; Luo, Y. Q.; Chen, D. L. Ammonia volatilization from synthetic fertilizers and its mitigation strategies: A global synthesis. Agric. Ecosyst. Environ. 2016, 232, 283-289.
205	Viero, F.; Bayer, C.; Fontoura, S. M. V.; de Moraes, R. P. Ammonia volatilization from nitrogen fertilizers in no-till wheat and maize in southern Brazil. Rev. Bras. Cienc. Solo 2014, 38 (5), 1515-1525.
